# Supplementary material for: Evaluation of DNA Extraction Methods Developed for Forensic and Ancient DNA Applications Using Bone Samples of Different Age
Source: MDPI journal article supplement (doi:10.3390/genes12020146), 2021-01-22
Supplement: s1 [file s1]

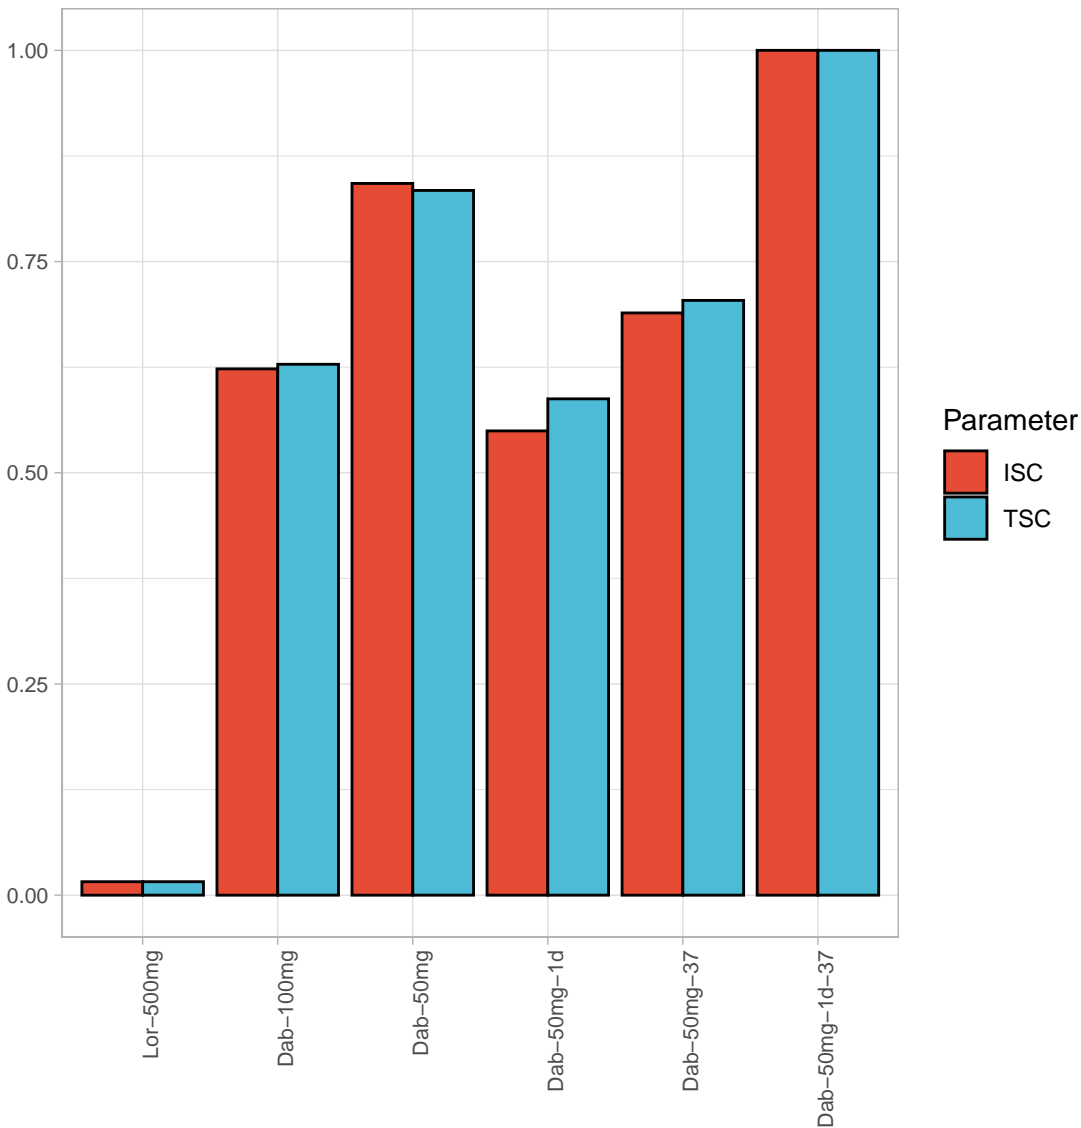

Supplementary figure S7 – Informative and total sequence content (ISC and TSC, respectively) normalized to the best performing method for all earlier trials of Sample B
