# Supplementary material for: Evaluation of DNA Extraction Methods Developed for Forensic and Ancient DNA Applications Using Bone Samples of Different Age
Source: MDPI journal article supplement (doi:10.3390/genes12020146), 2021-01-22
Supplement: s1 [file s1]

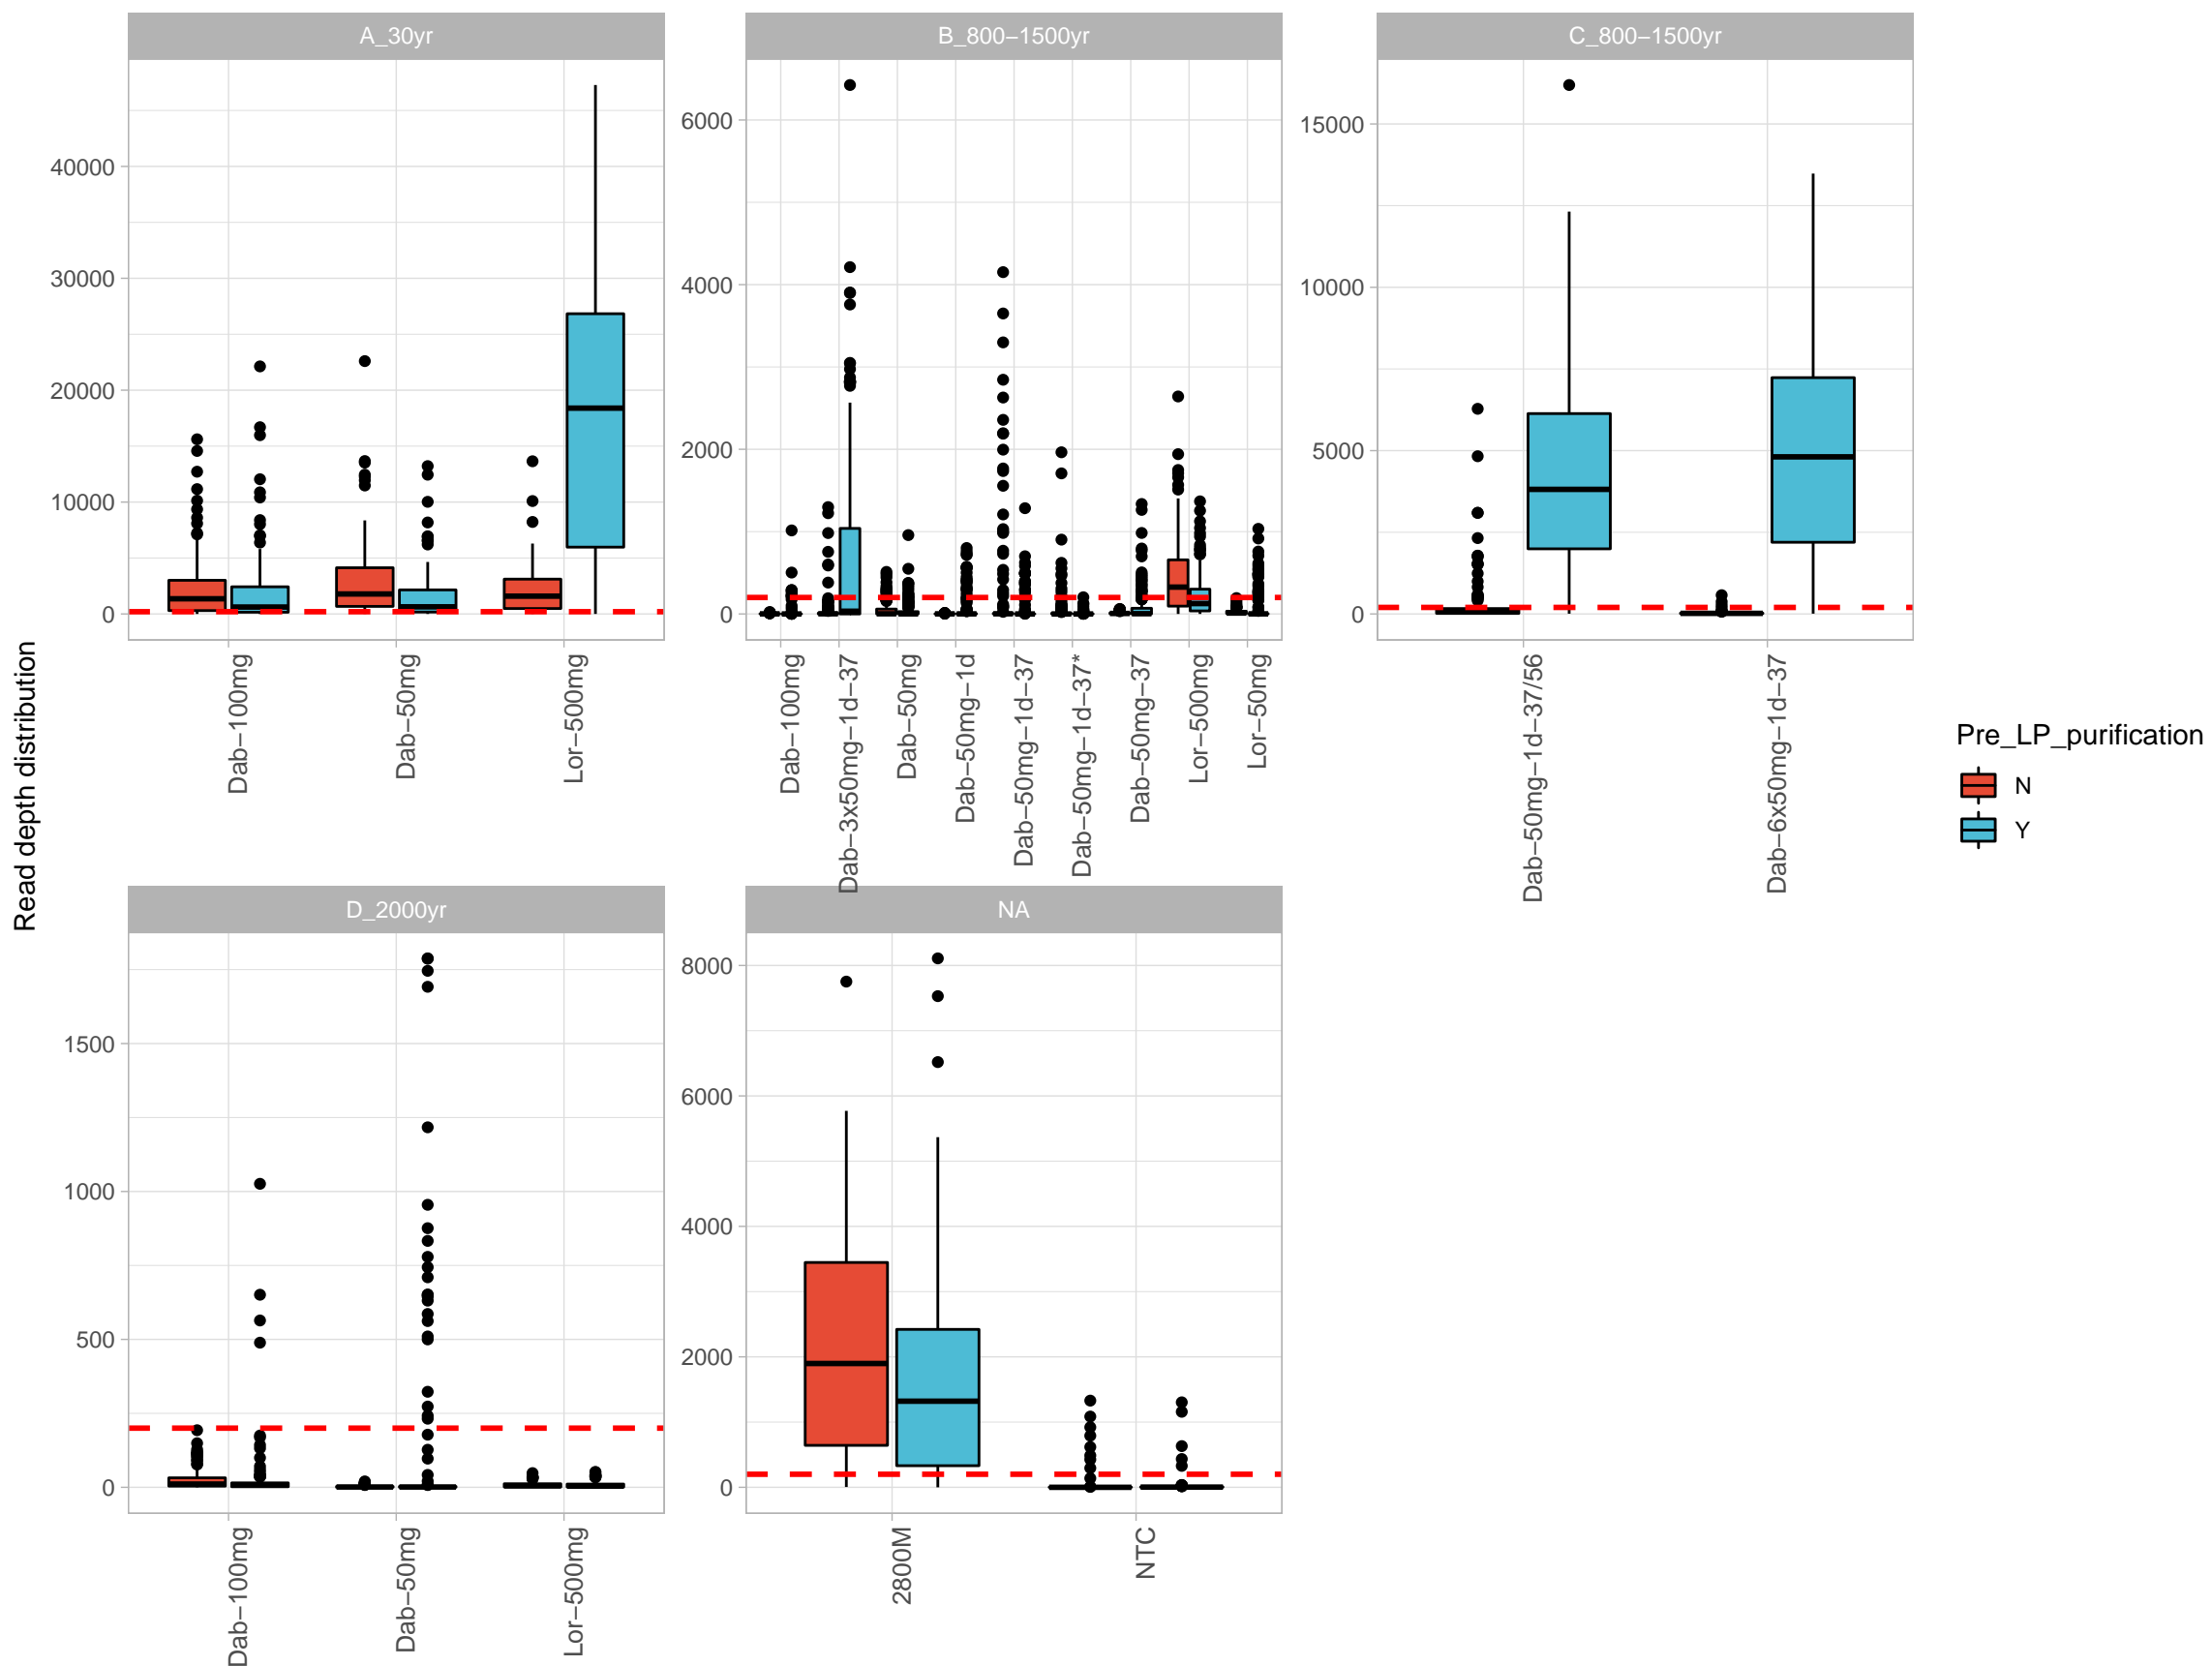

Supplementary figure S12 – Read depth distribution per sample and extraction trial prepared using the VISAGE basic tool A&A with and without a pre-library preparation purification step. Red dashed line represent 200 reads.
