# Supplementary material for: Evaluation of DNA Extraction Methods Developed for Forensic and Ancient DNA Applications Using Bone Samples of Different Age
Source: MDPI journal article supplement (doi:10.3390/genes12020146), 2021-01-22
Supplement: s1 [file s1]

**A**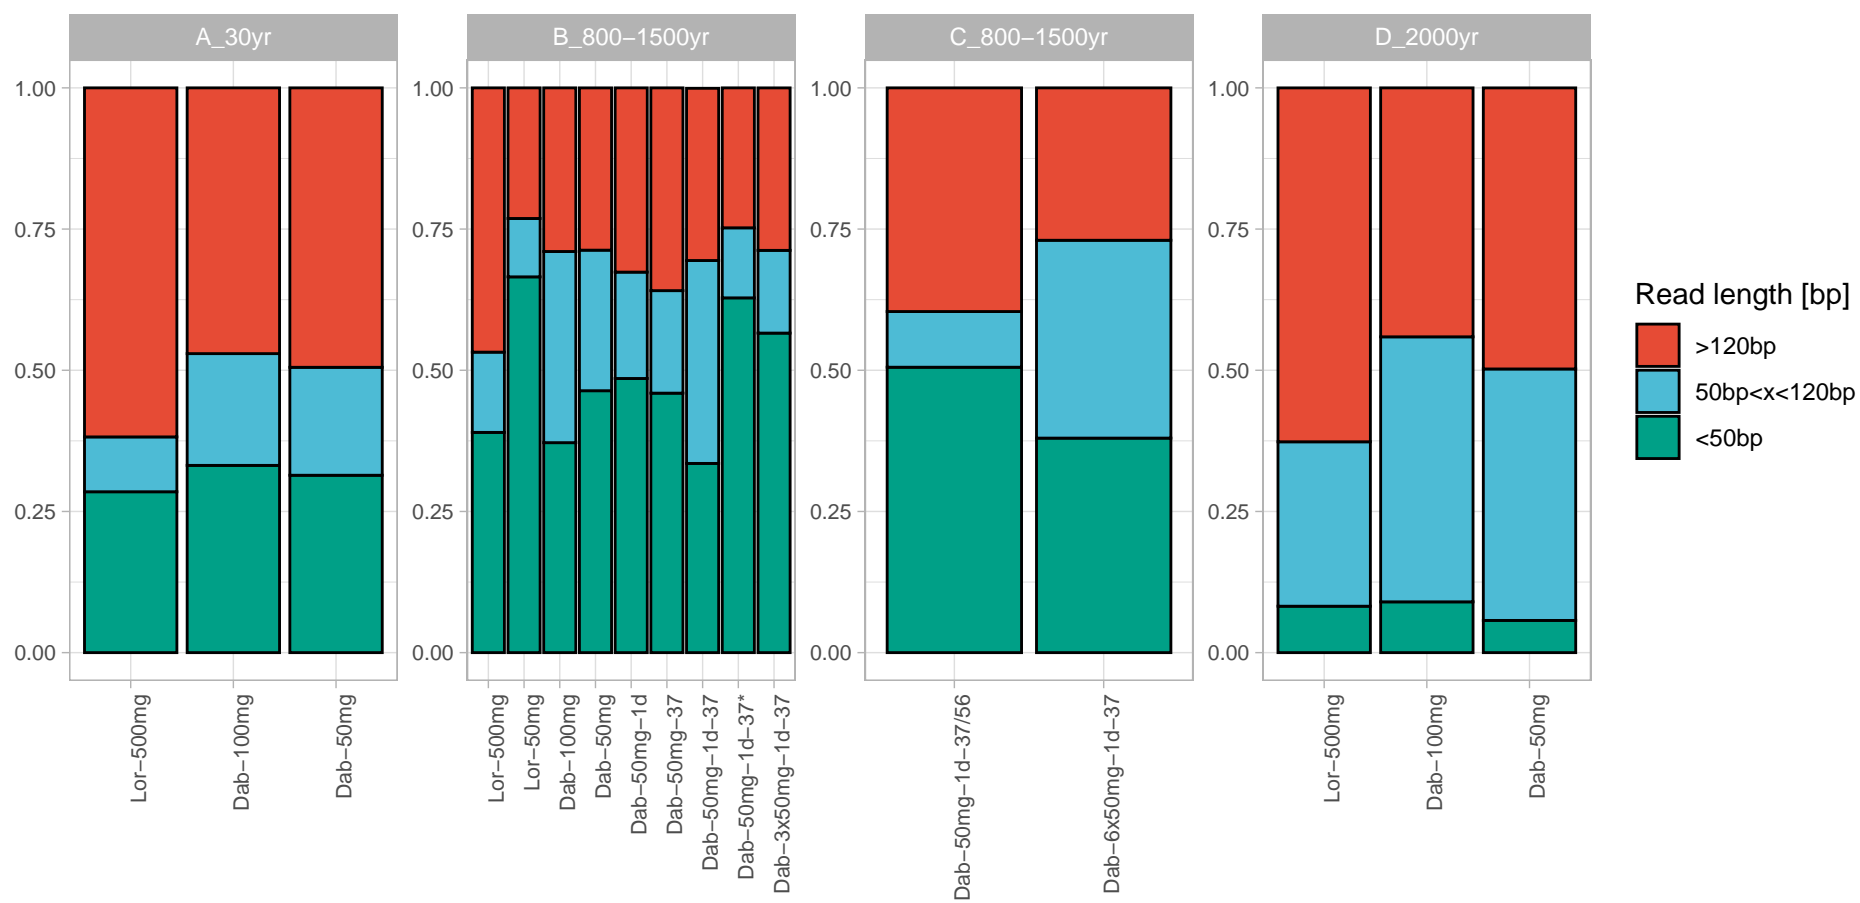**B**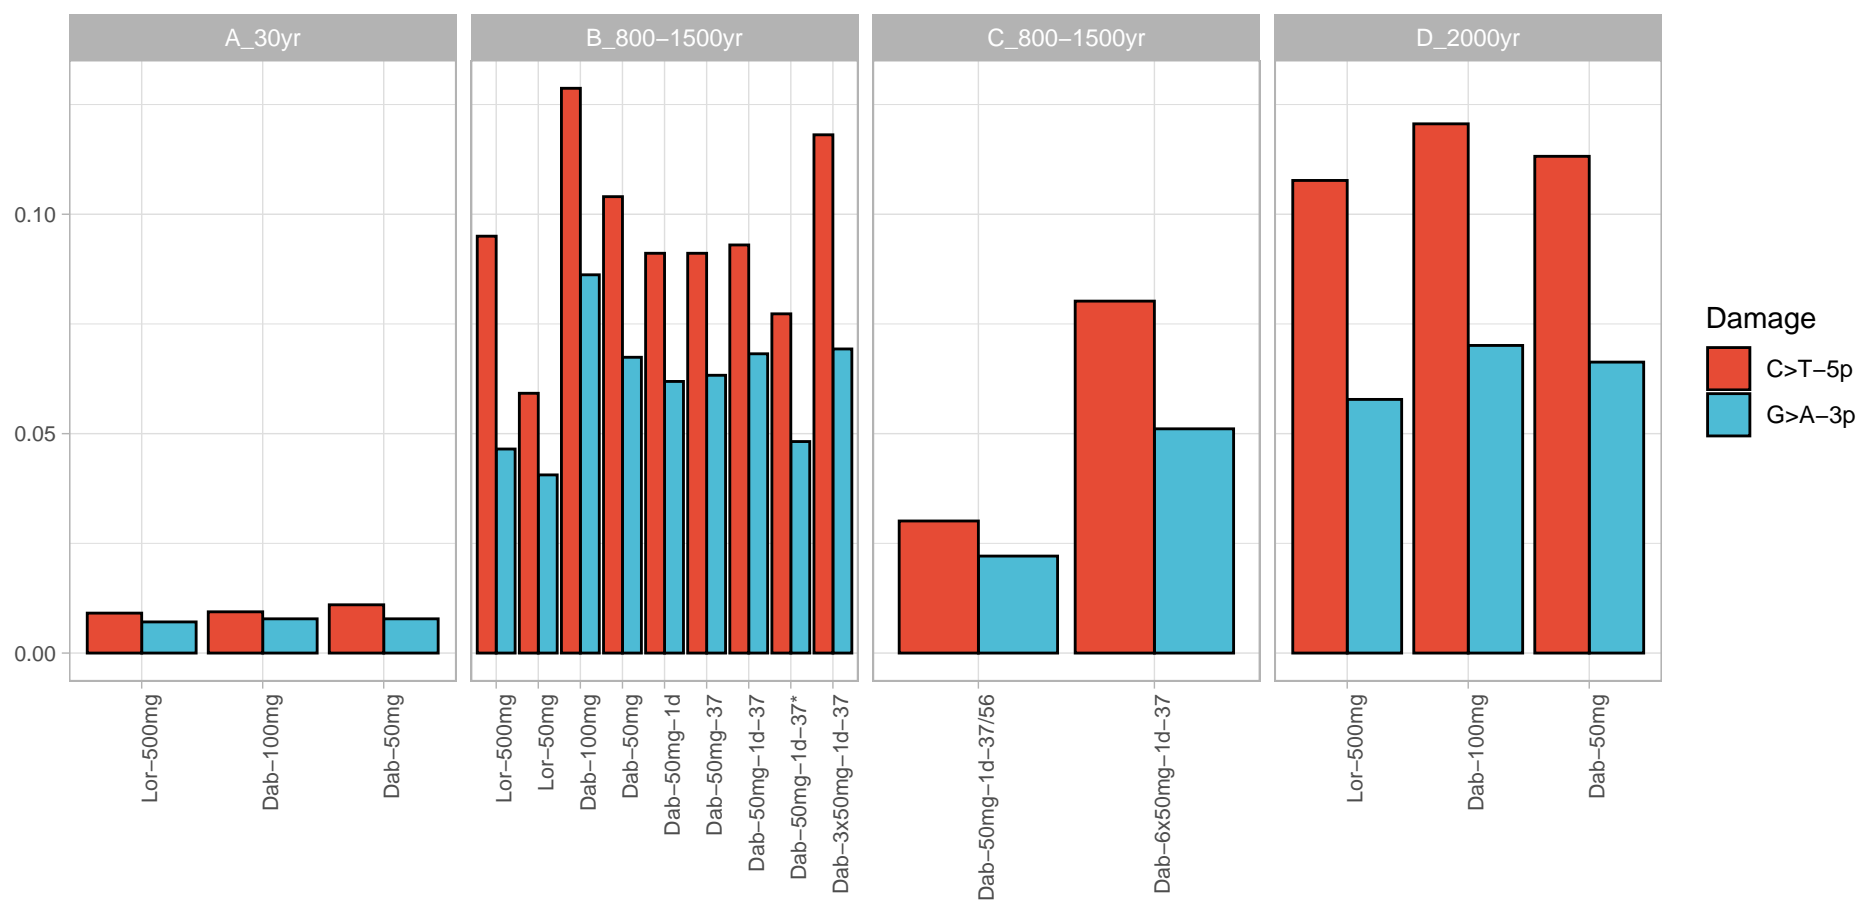

Supplementary figure S6 – (A) Normalized read length distribution per method and sample. (B) Mean frequency of the most expected damage patterns (nucleotide substitutions) in ancient DNA data: G>A at the 3' last 25 positions and C>T at the 5' first 25 positions.
