# Supplementary material for: Evaluation of DNA Extraction Methods Developed for Forensic and Ancient DNA Applications Using Bone Samples of Different Age
Source: MDPI journal article supplement (doi:10.3390/genes12020146), 2021-01-22
Supplement: s1 [file s1]

**A**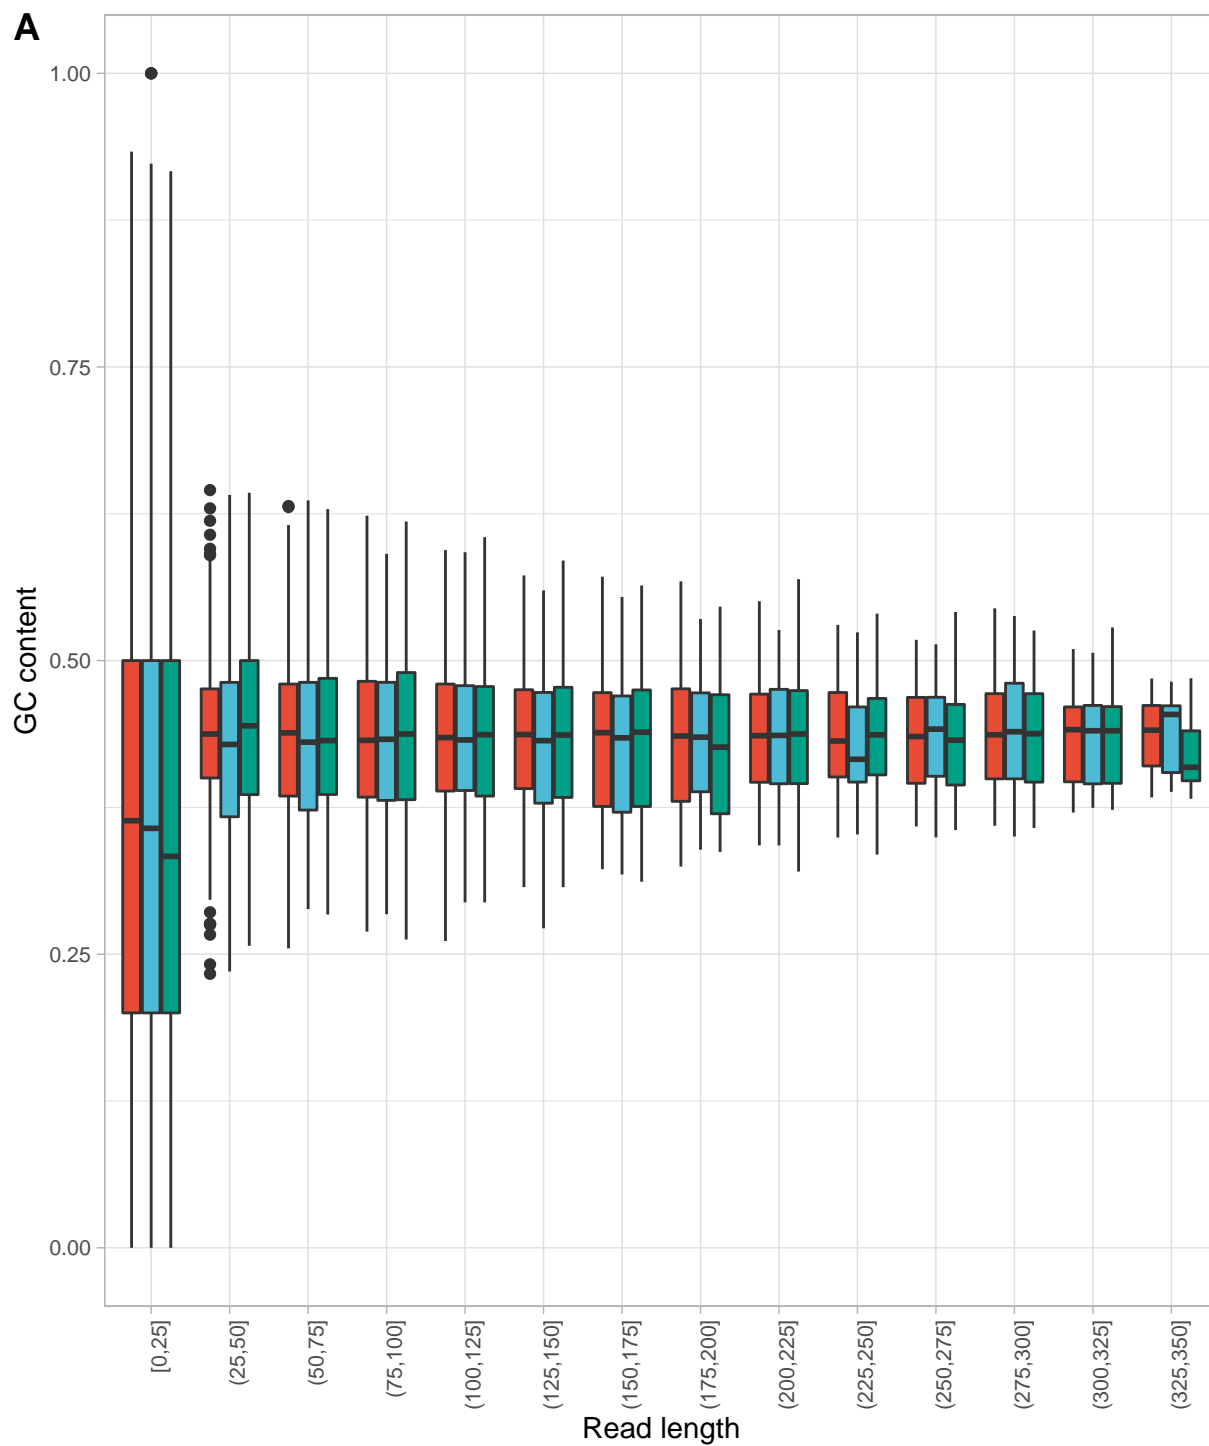**B**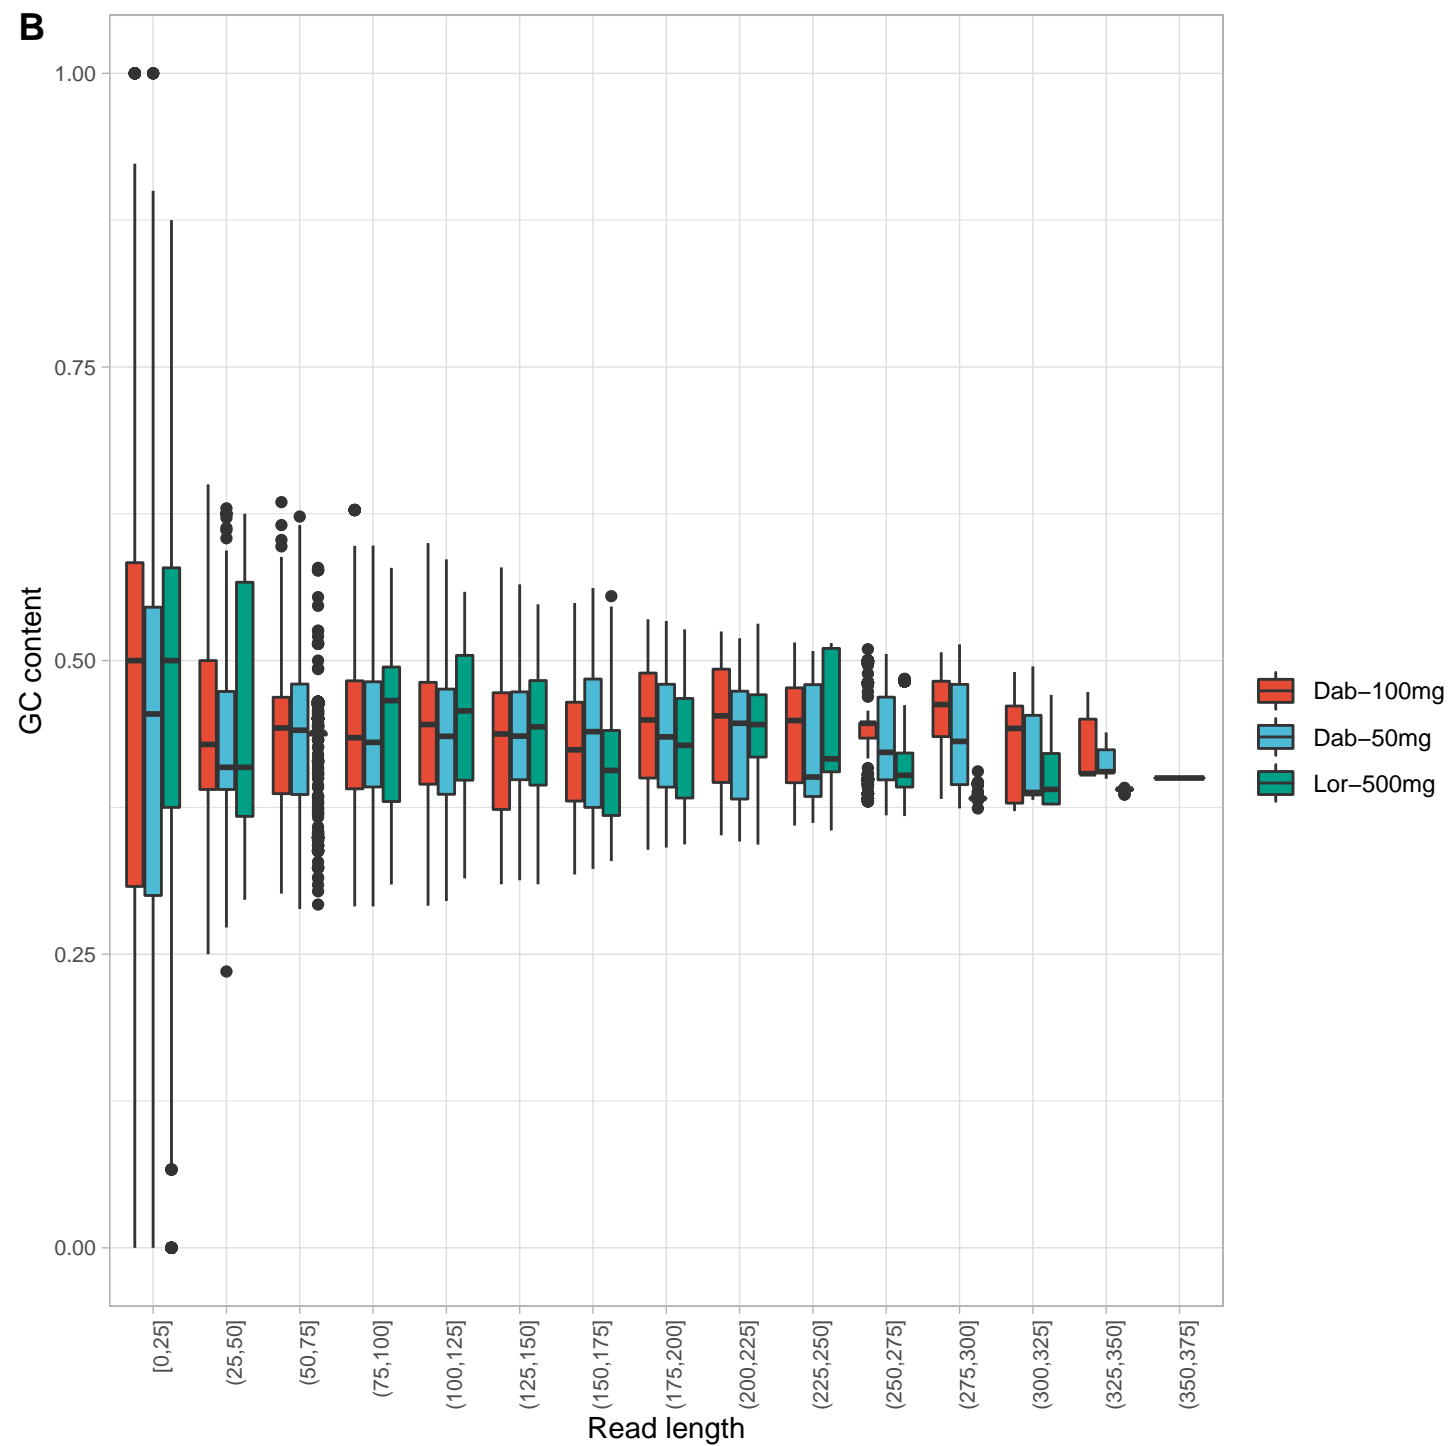

Supplementary figure S8 – GC content distribution binned per read length for (A) sample A – 30 years and (B) sample D – 2000 years extraction trials.
