# Supplementary material for: Evaluation of DNA Extraction Methods Developed for Forensic and Ancient DNA Applications Using Bone Samples of Different Age
Source: MDPI journal article supplement (doi:10.3390/genes12020146), 2021-01-22
Supplement: s1 [file s1]

**A**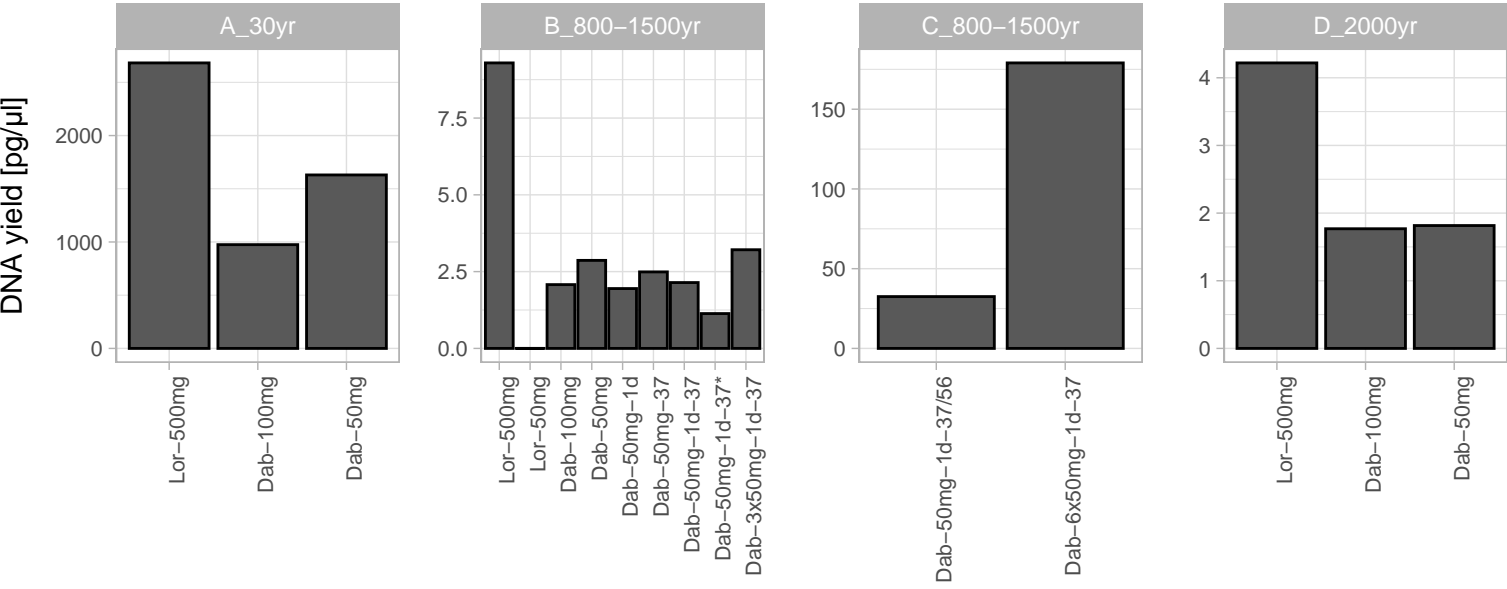**B**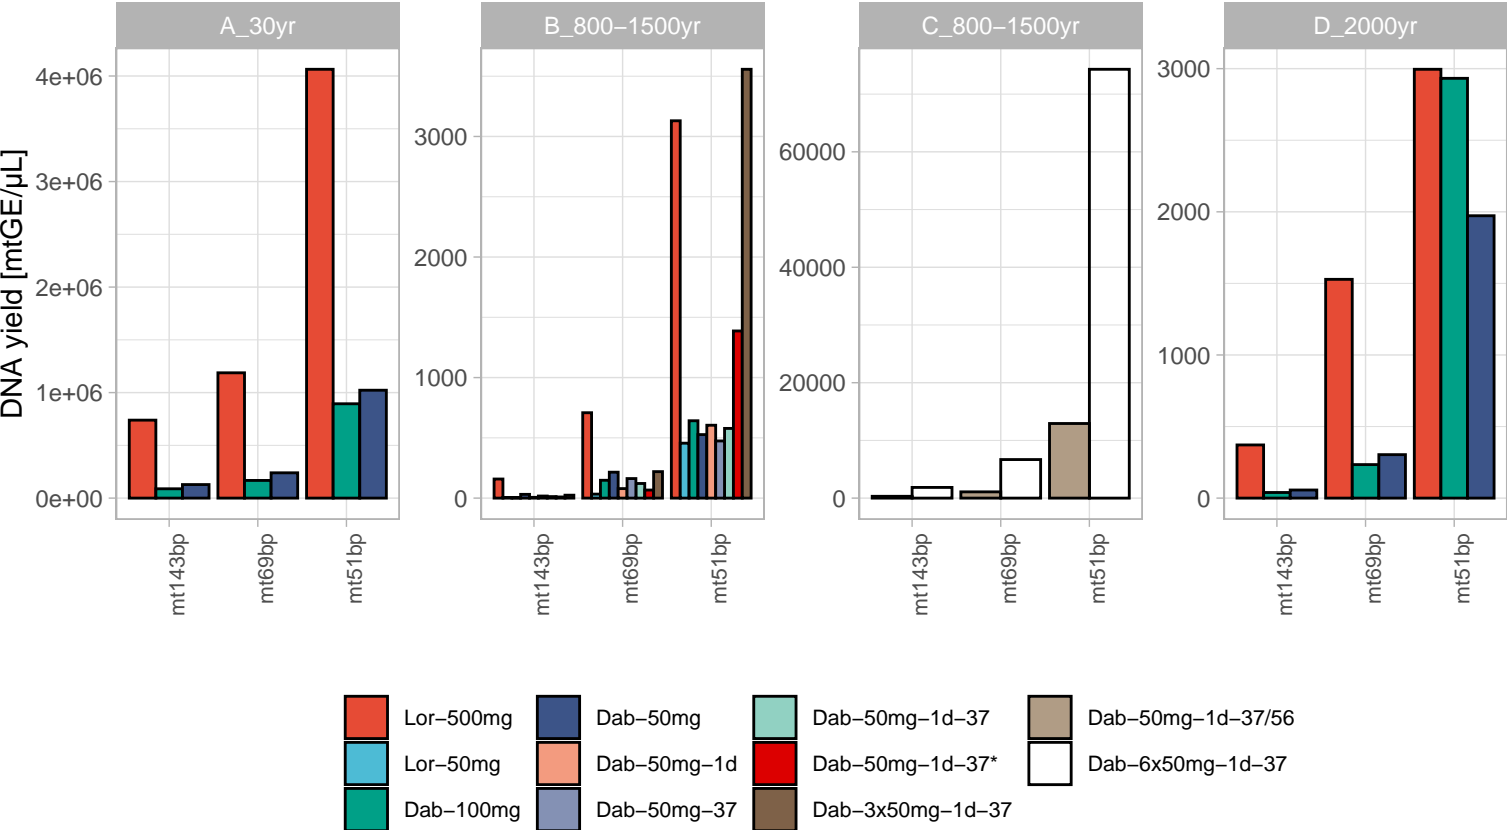

Supplementary figure S1 – Average DNA yield for the nuclear [pg/μl] (A) and mtDNA targets [mtGE/μL] (B) for all extraction trials in all four bone samples tested.
