# Supplementary material for: Evaluation of DNA Extraction Methods Developed for Forensic and Ancient DNA Applications Using Bone Samples of Different Age
Source: MDPI journal article supplement (doi:10.3390/genes12020146), 2021-01-22
Supplement: s1 [file s1]

**A**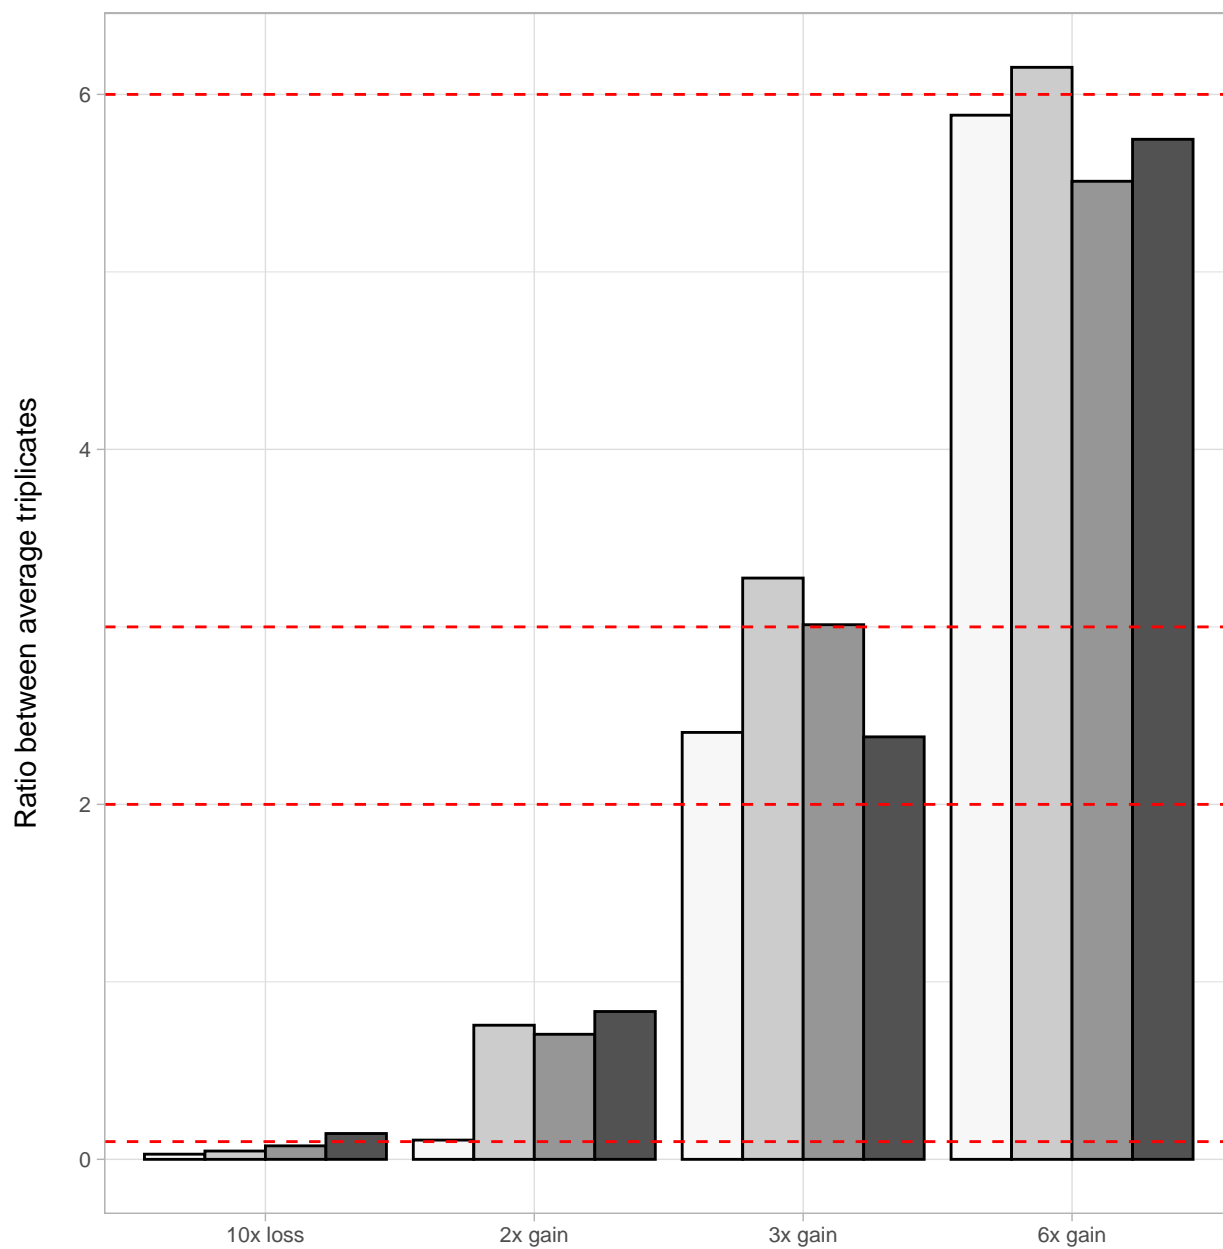**B**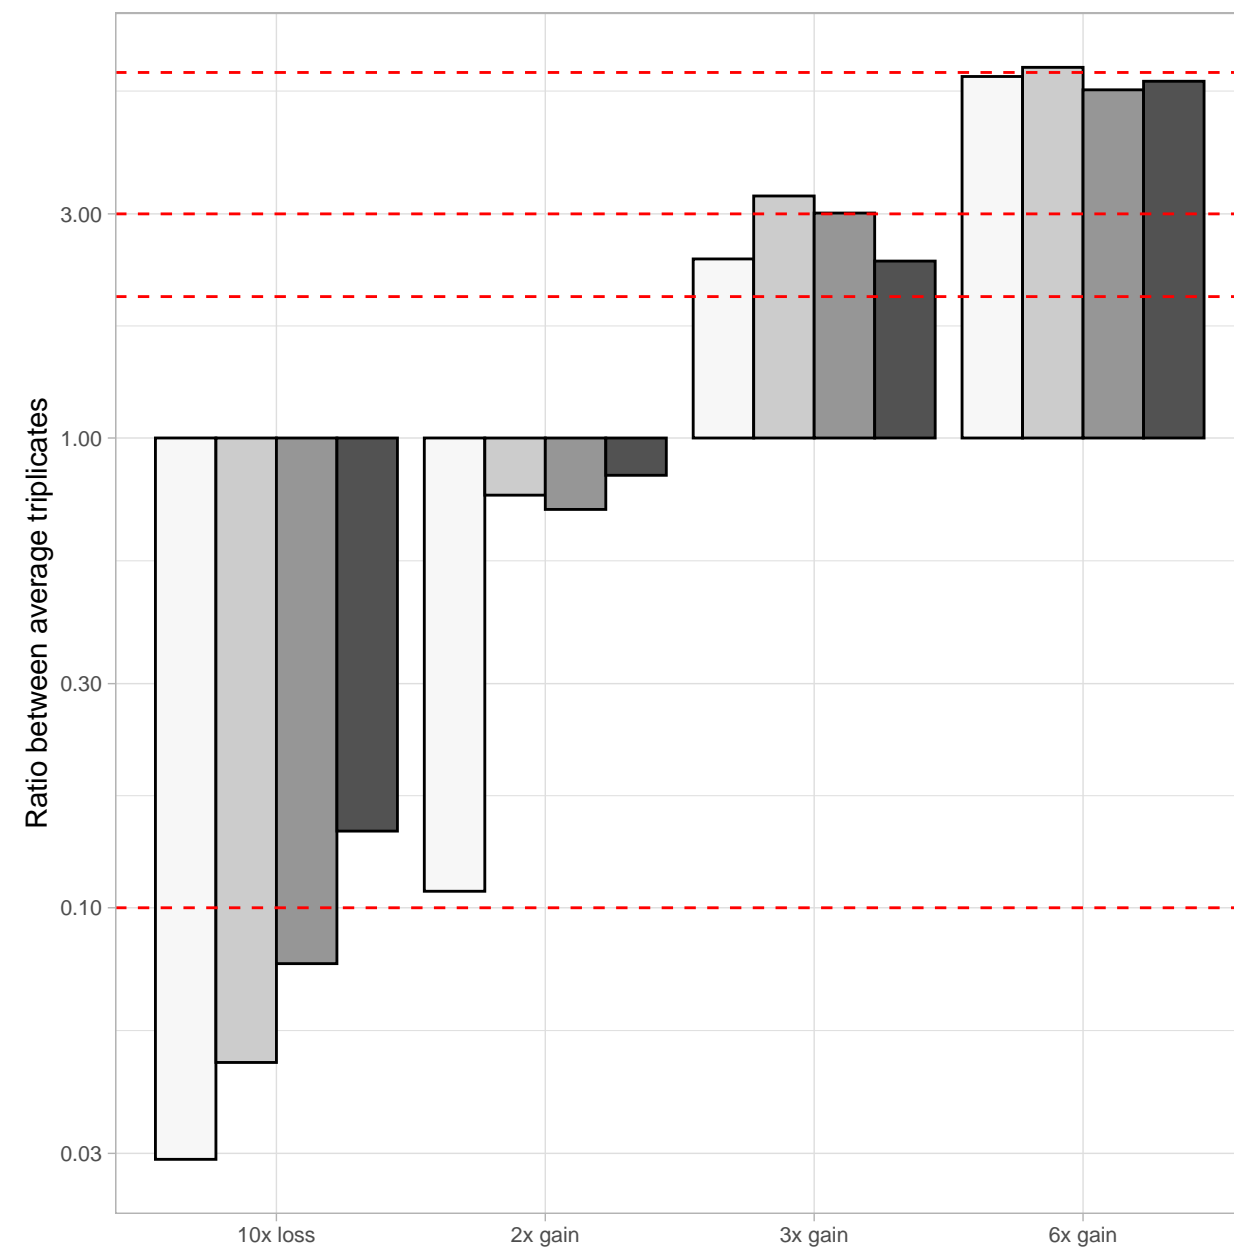

mt143bp
  mt69bp
  nuRNU
  mt51bp

Supplementary figure S2 – Ratio between normal input protocol and alternative protocol (10x loss: Lor–500mg/Lor–50mg, 2x gain: Dab–100mg/Dab–50mg, 3x gain: Dab–3x50mg/Dab–50mg and 6x gain: Dab–6x50mg/Dab–50mg), red lines depict theoretical loss and gain proportions (0.1, 2, 3 and 6). In order to ease visualization both normal coordinates (A) and log 10 scale (B) are presented.
