# Supplementary material for: Evaluation of DNA Extraction Methods Developed for Forensic and Ancient DNA Applications Using Bone Samples of Different Age
Source: MDPI journal article supplement (doi:10.3390/genes12020146), 2021-01-22
Supplement: s1 [file s1]

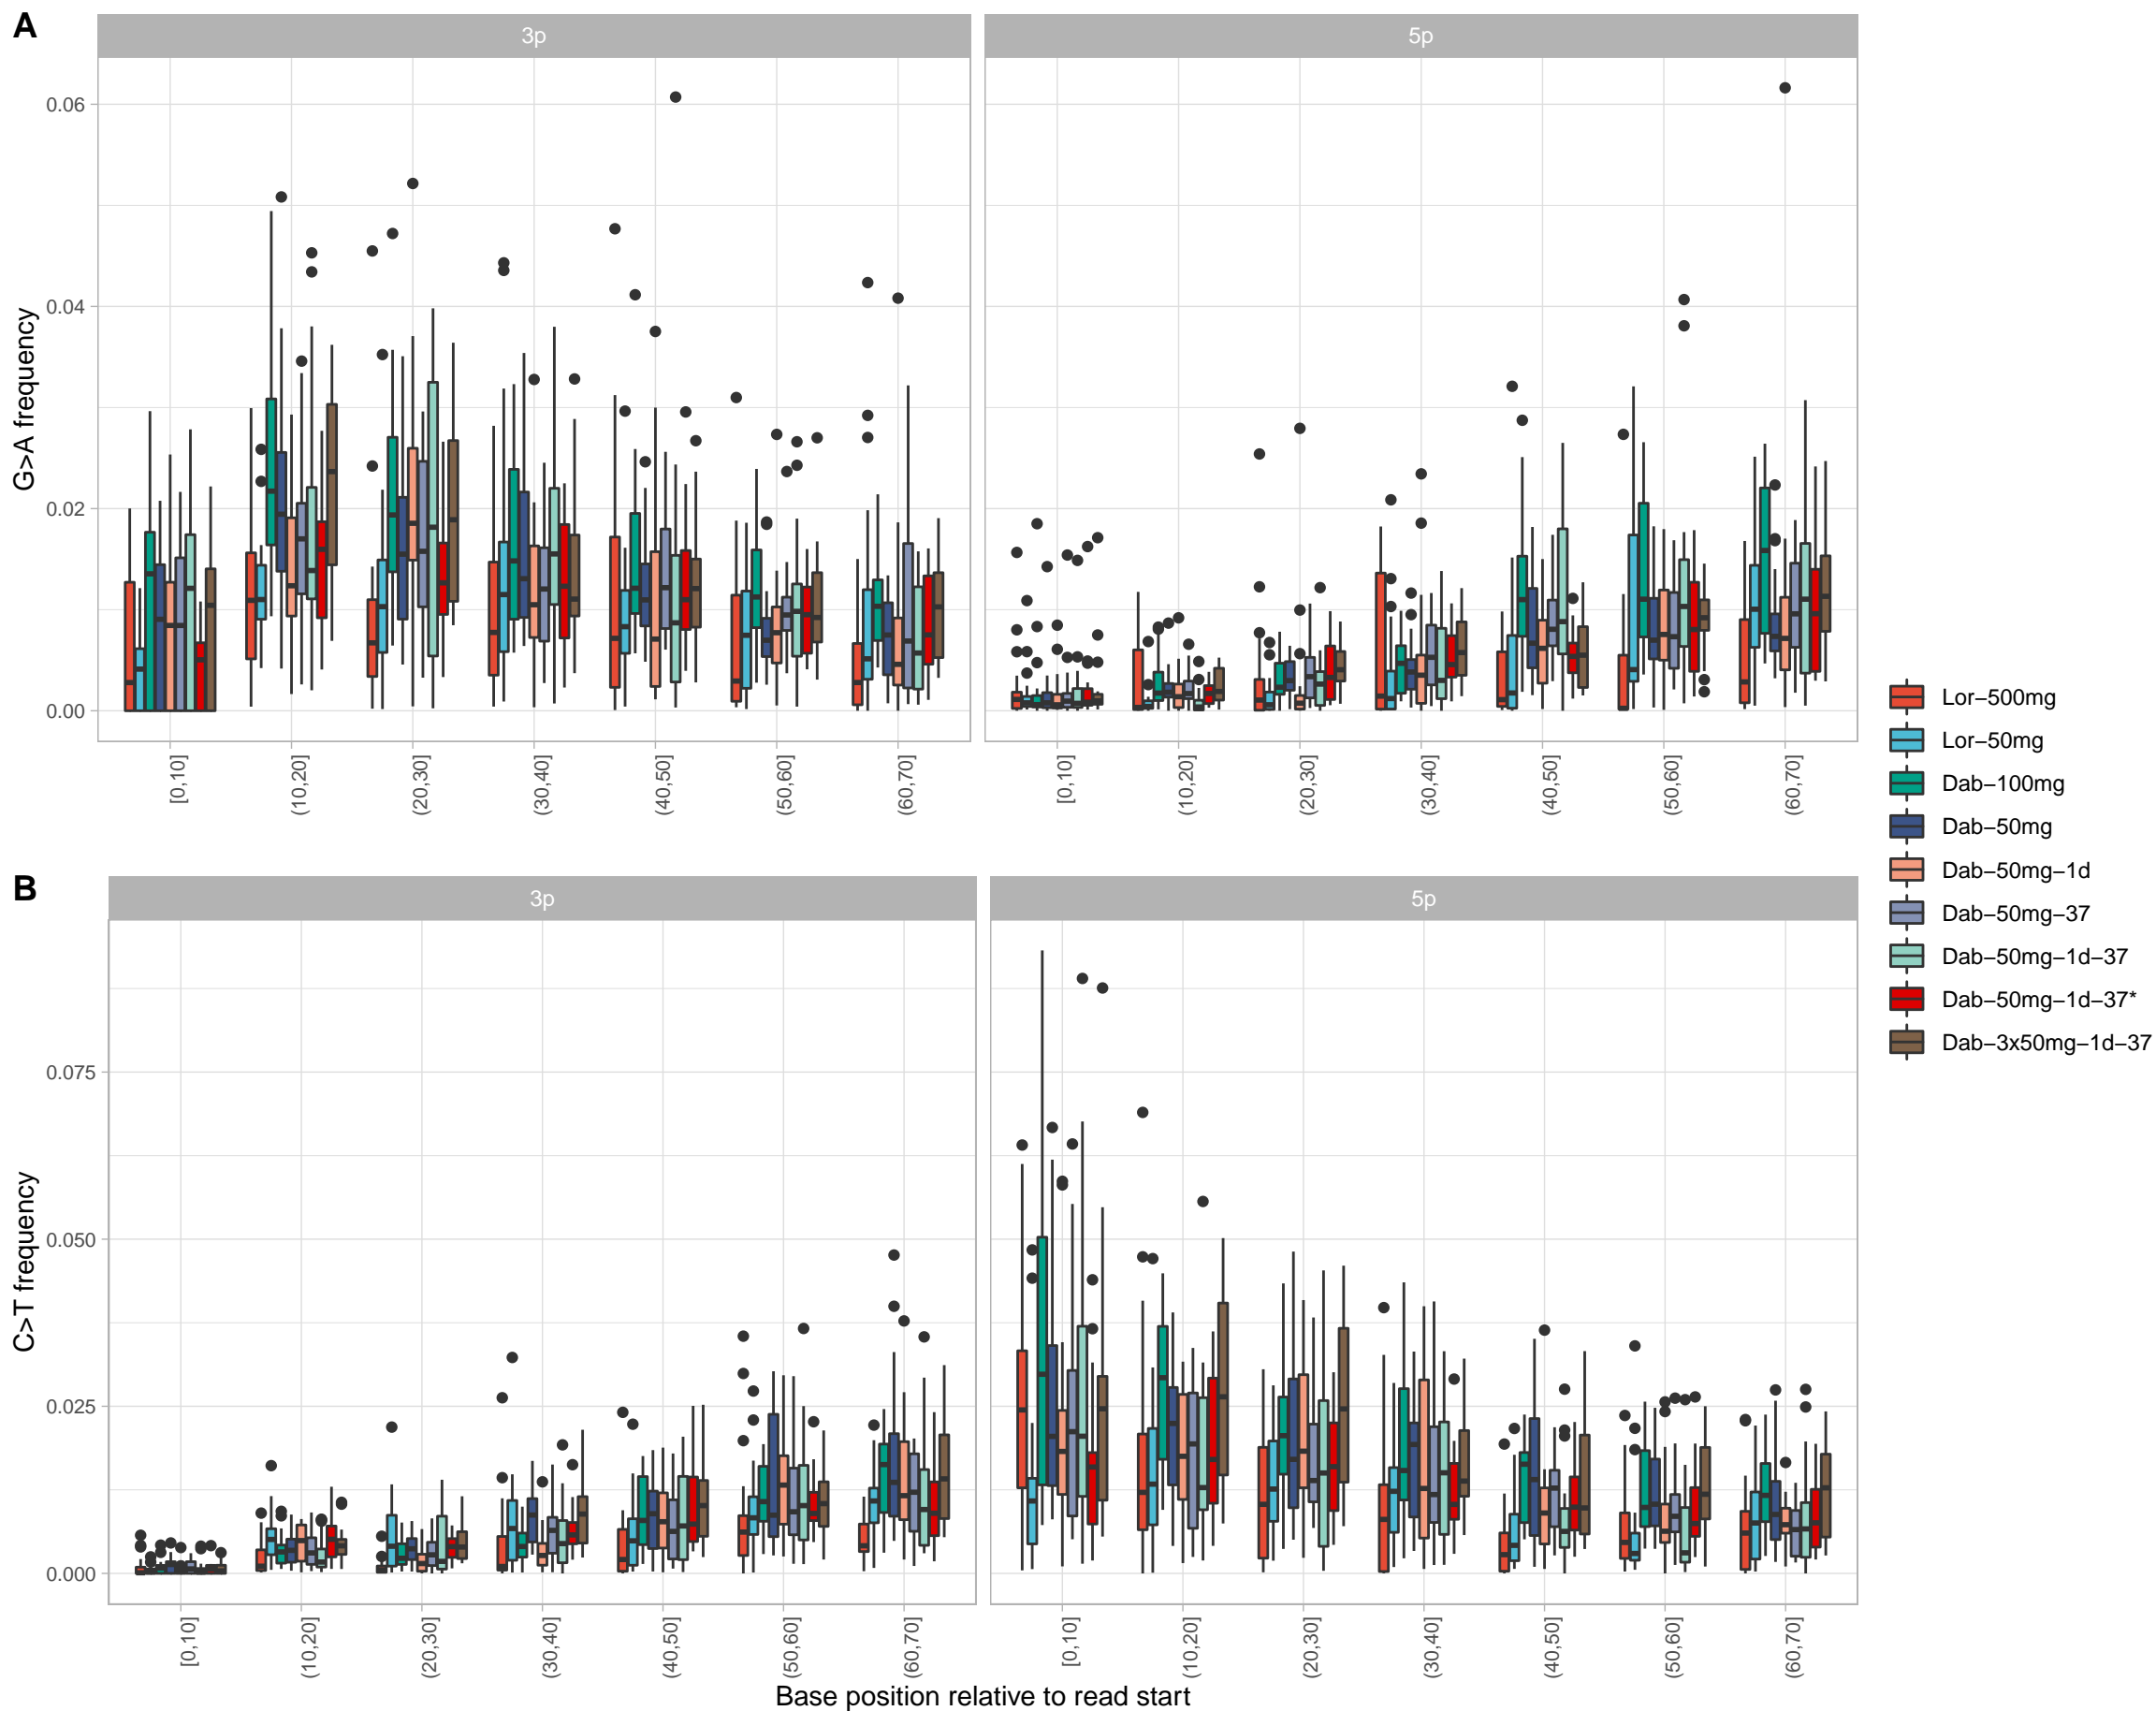

Supplementary figure S10 – Frequency of G>A (A) and C>T (B) damage binned per base position relative to read start in 3p and 5p ends for sample B extraction trials.
