# Supplementary material for: Evaluation of DNA Extraction Methods Developed for Forensic and Ancient DNA Applications Using Bone Samples of Different Age
Source: MDPI journal article supplement (doi:10.3390/genes12020146), 2021-01-22
Supplement: s1 [file s1]

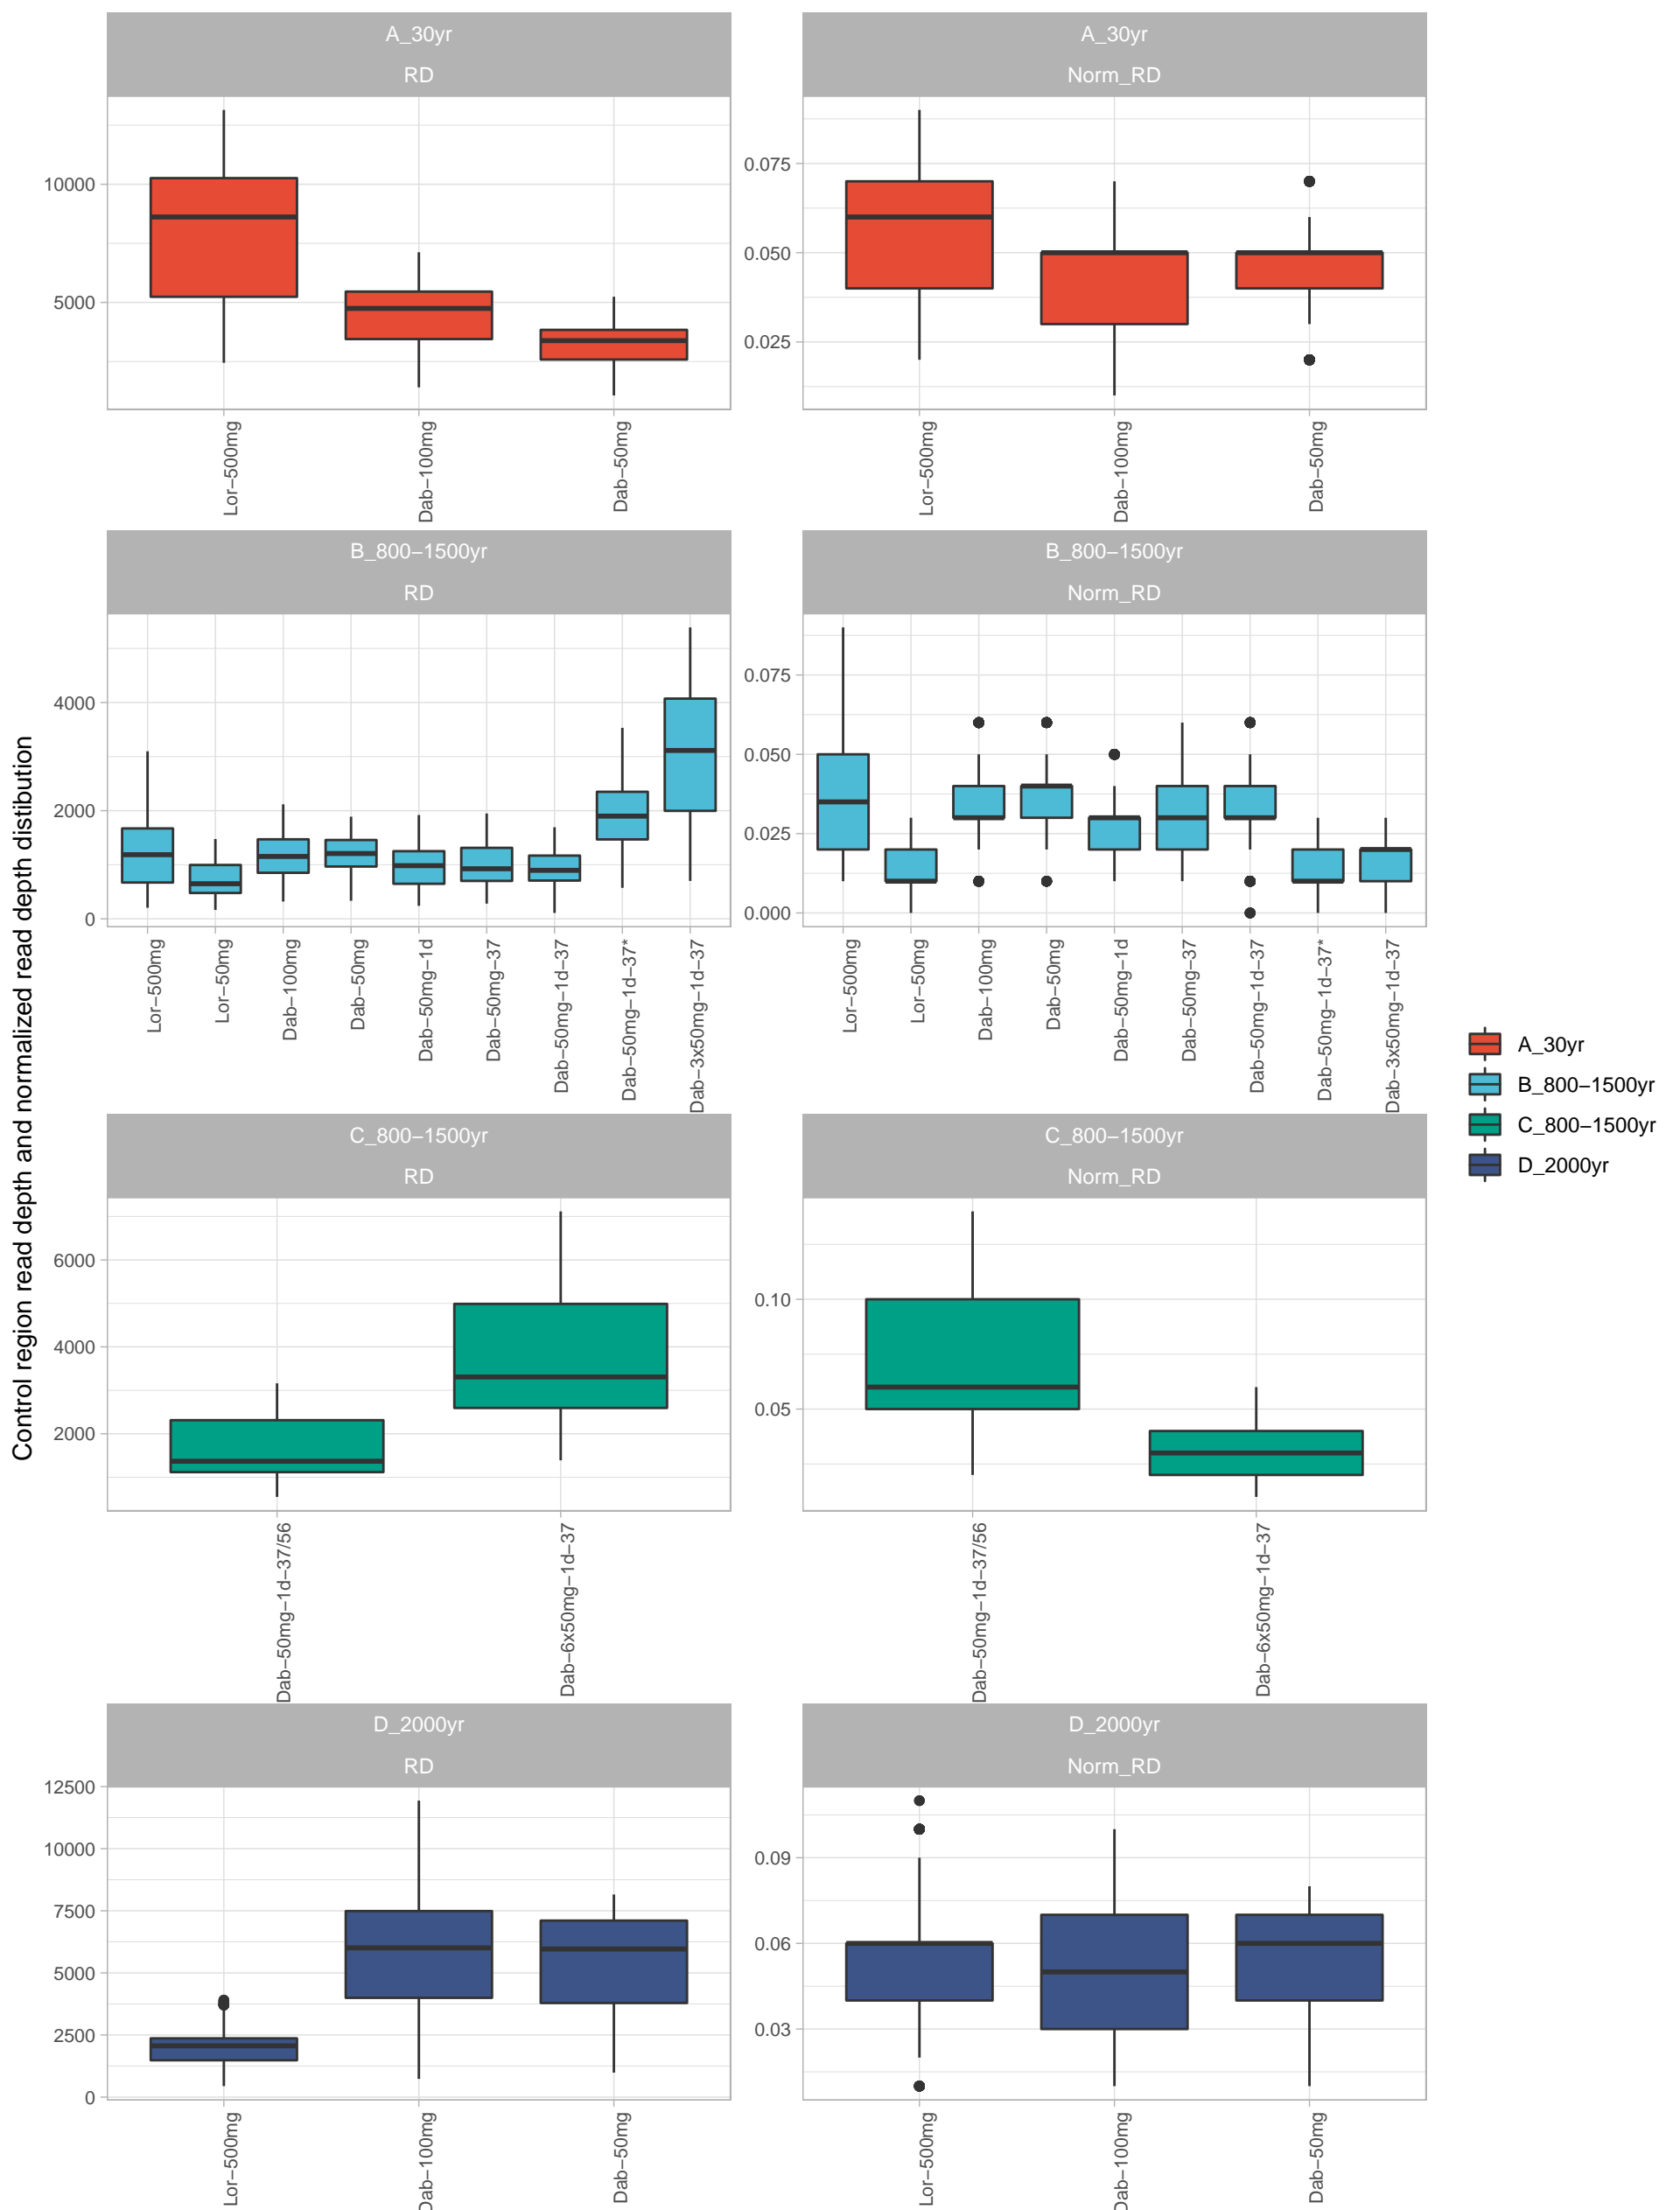

Supplementary figure S4 – Read depth distribution per position of the control region and normalized read depth (divided by total number of reads) per position of the control region present per sample.
