# Supplementary material for: Evaluation of DNA Extraction Methods Developed for Forensic and Ancient DNA Applications Using Bone Samples of Different Age
Source: MDPI journal article supplement (doi:10.3390/genes12020146), 2021-01-22
Supplement: s1 [file s1]

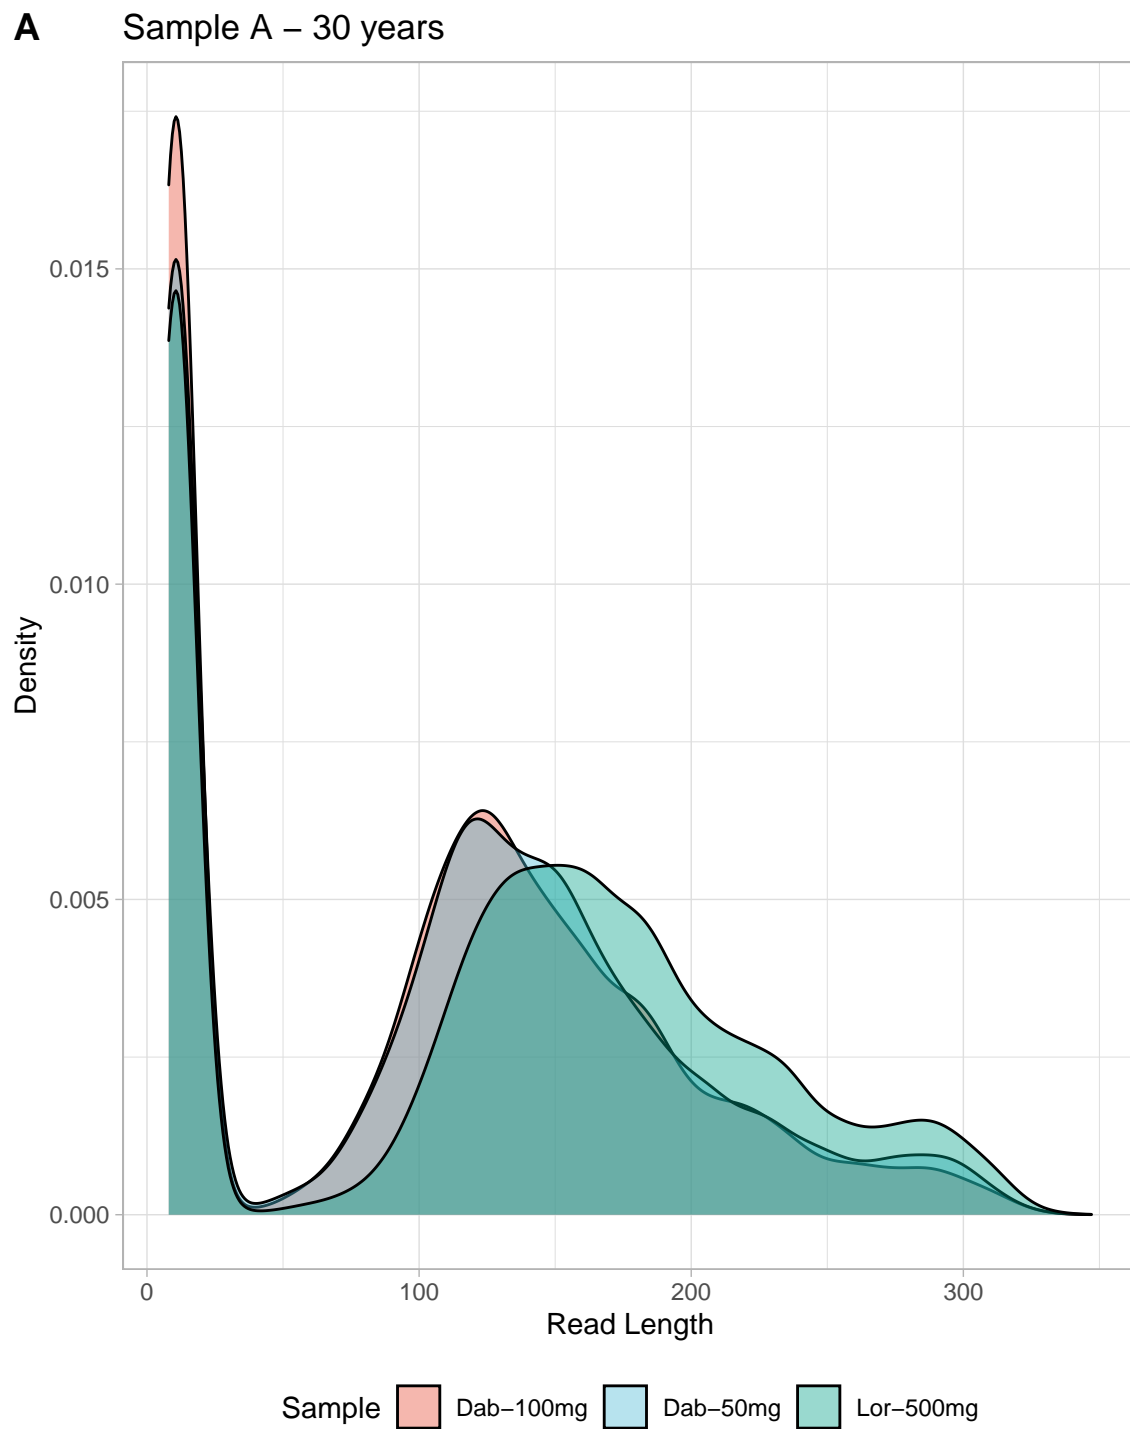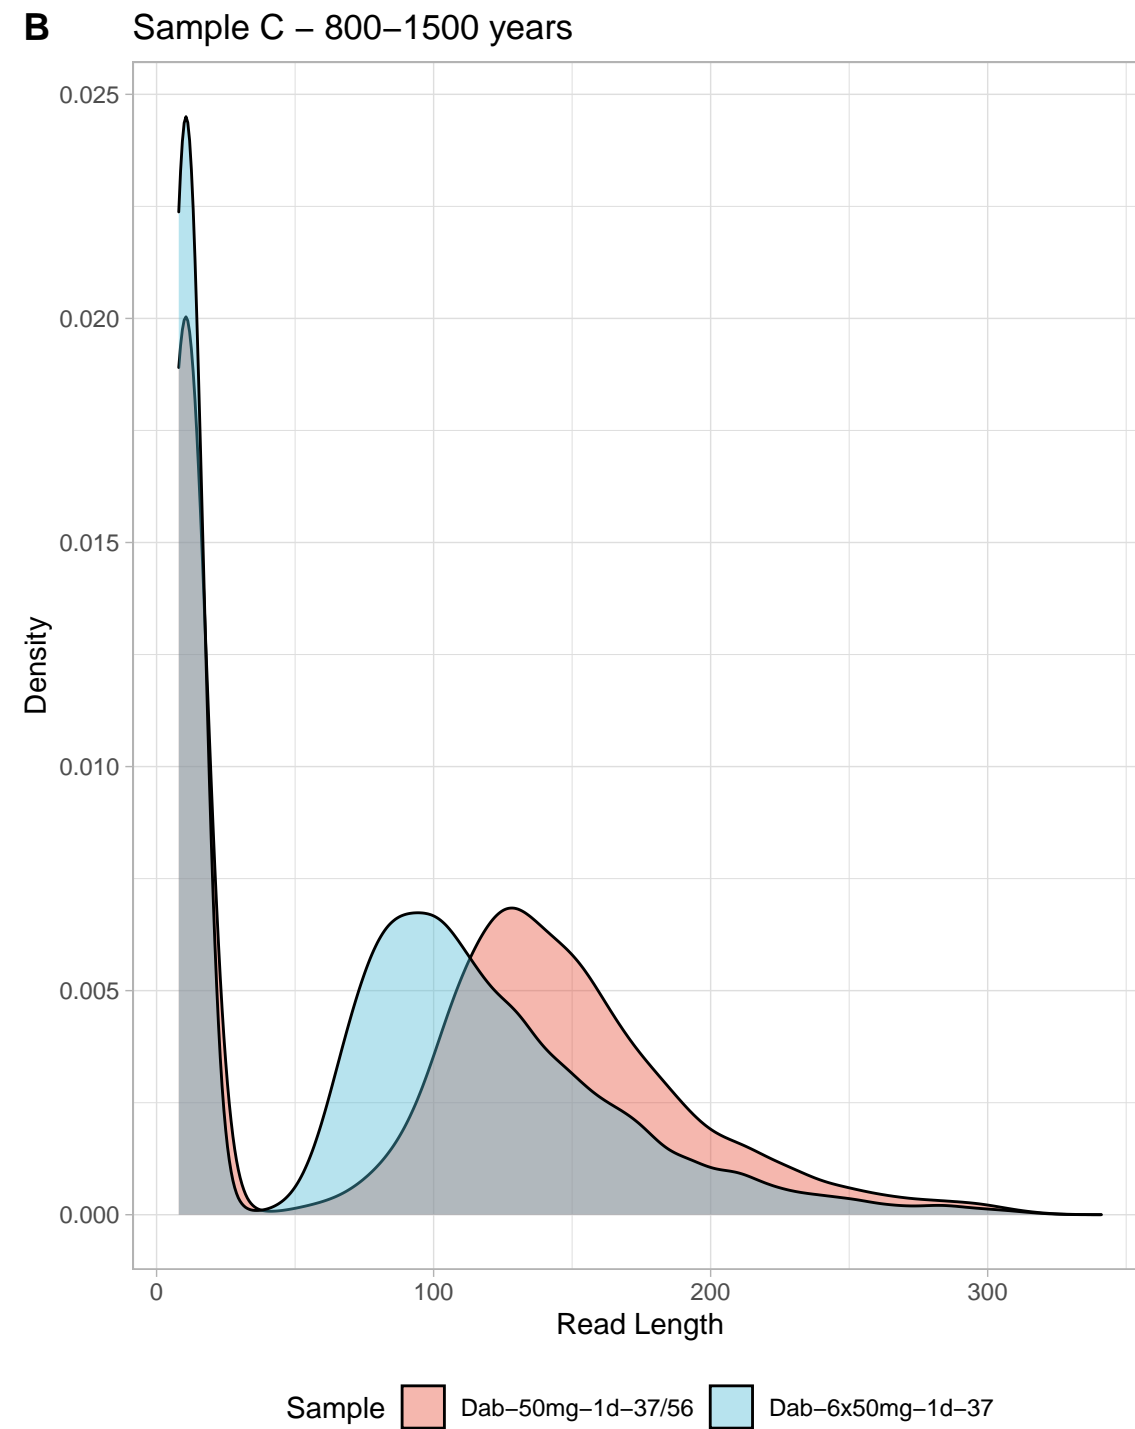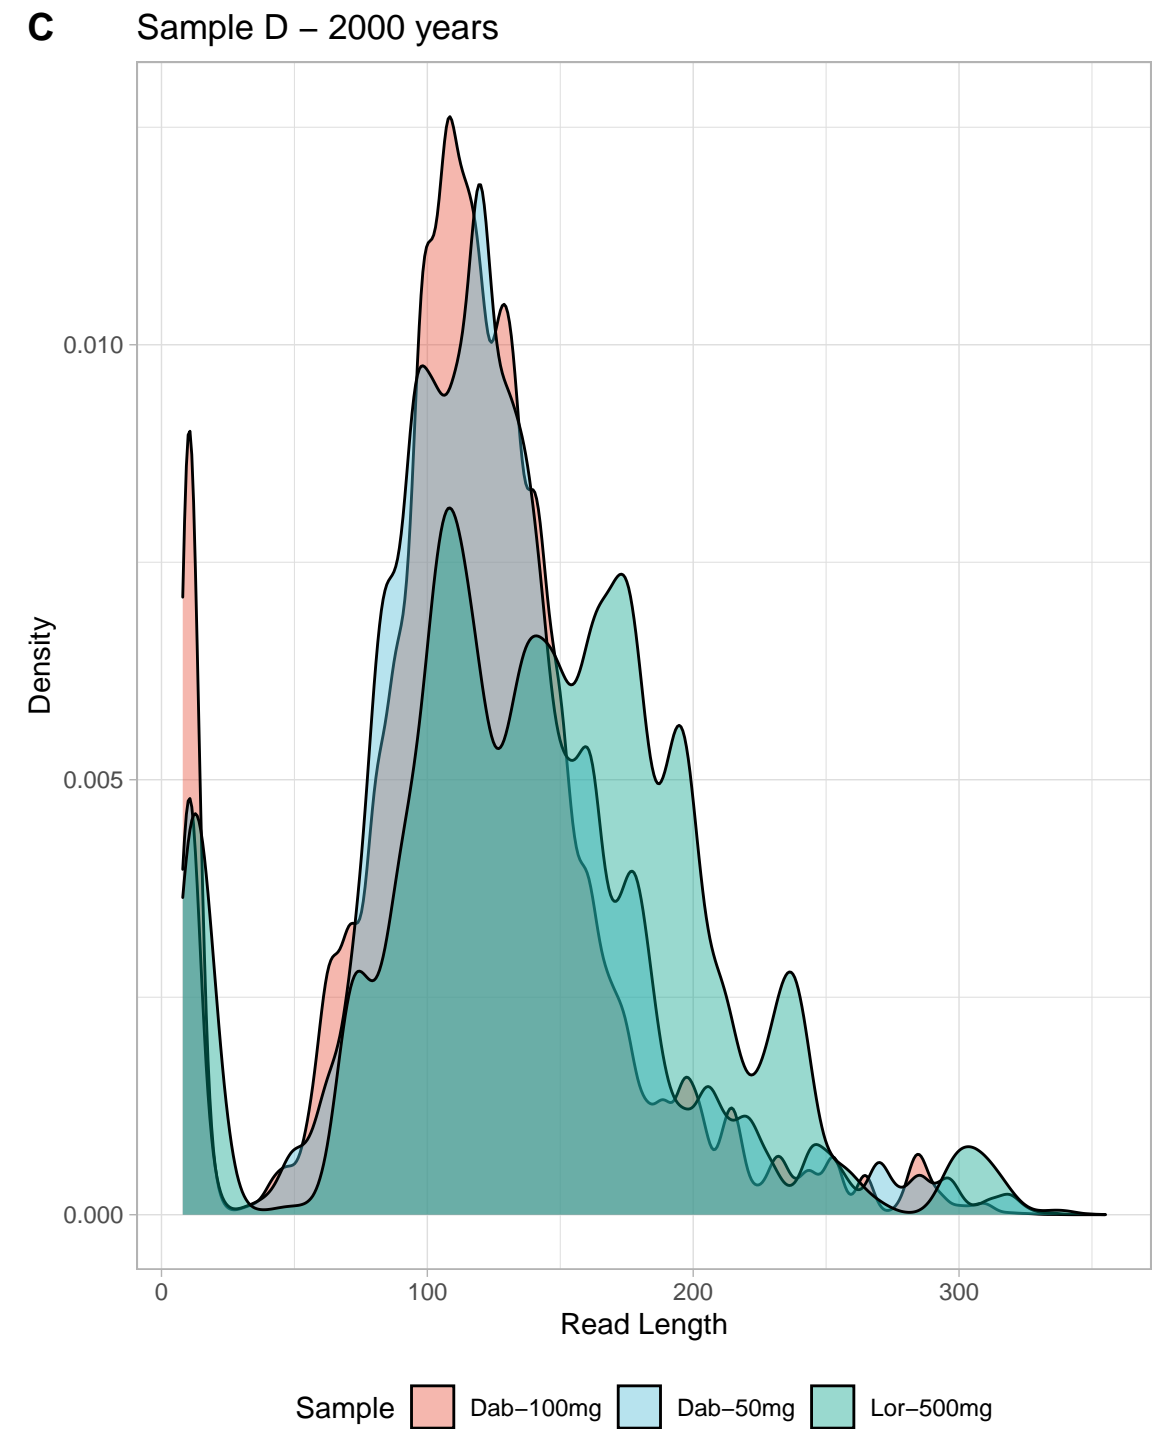

Supplementary figure S5 – Read length density per method for (A) sample A – 30 years, (B) sample C – 800–1500 years and (C) sample D – 2000 years.
