# Supplementary figures and images for: Evaluation of DNA Extraction Methods Developed for Forensic and Ancient DNA Applications Using Bone Samples of Different Age
Source: MDPI journal article supplement (doi:10.3390/genes12020146), 2021-01-22

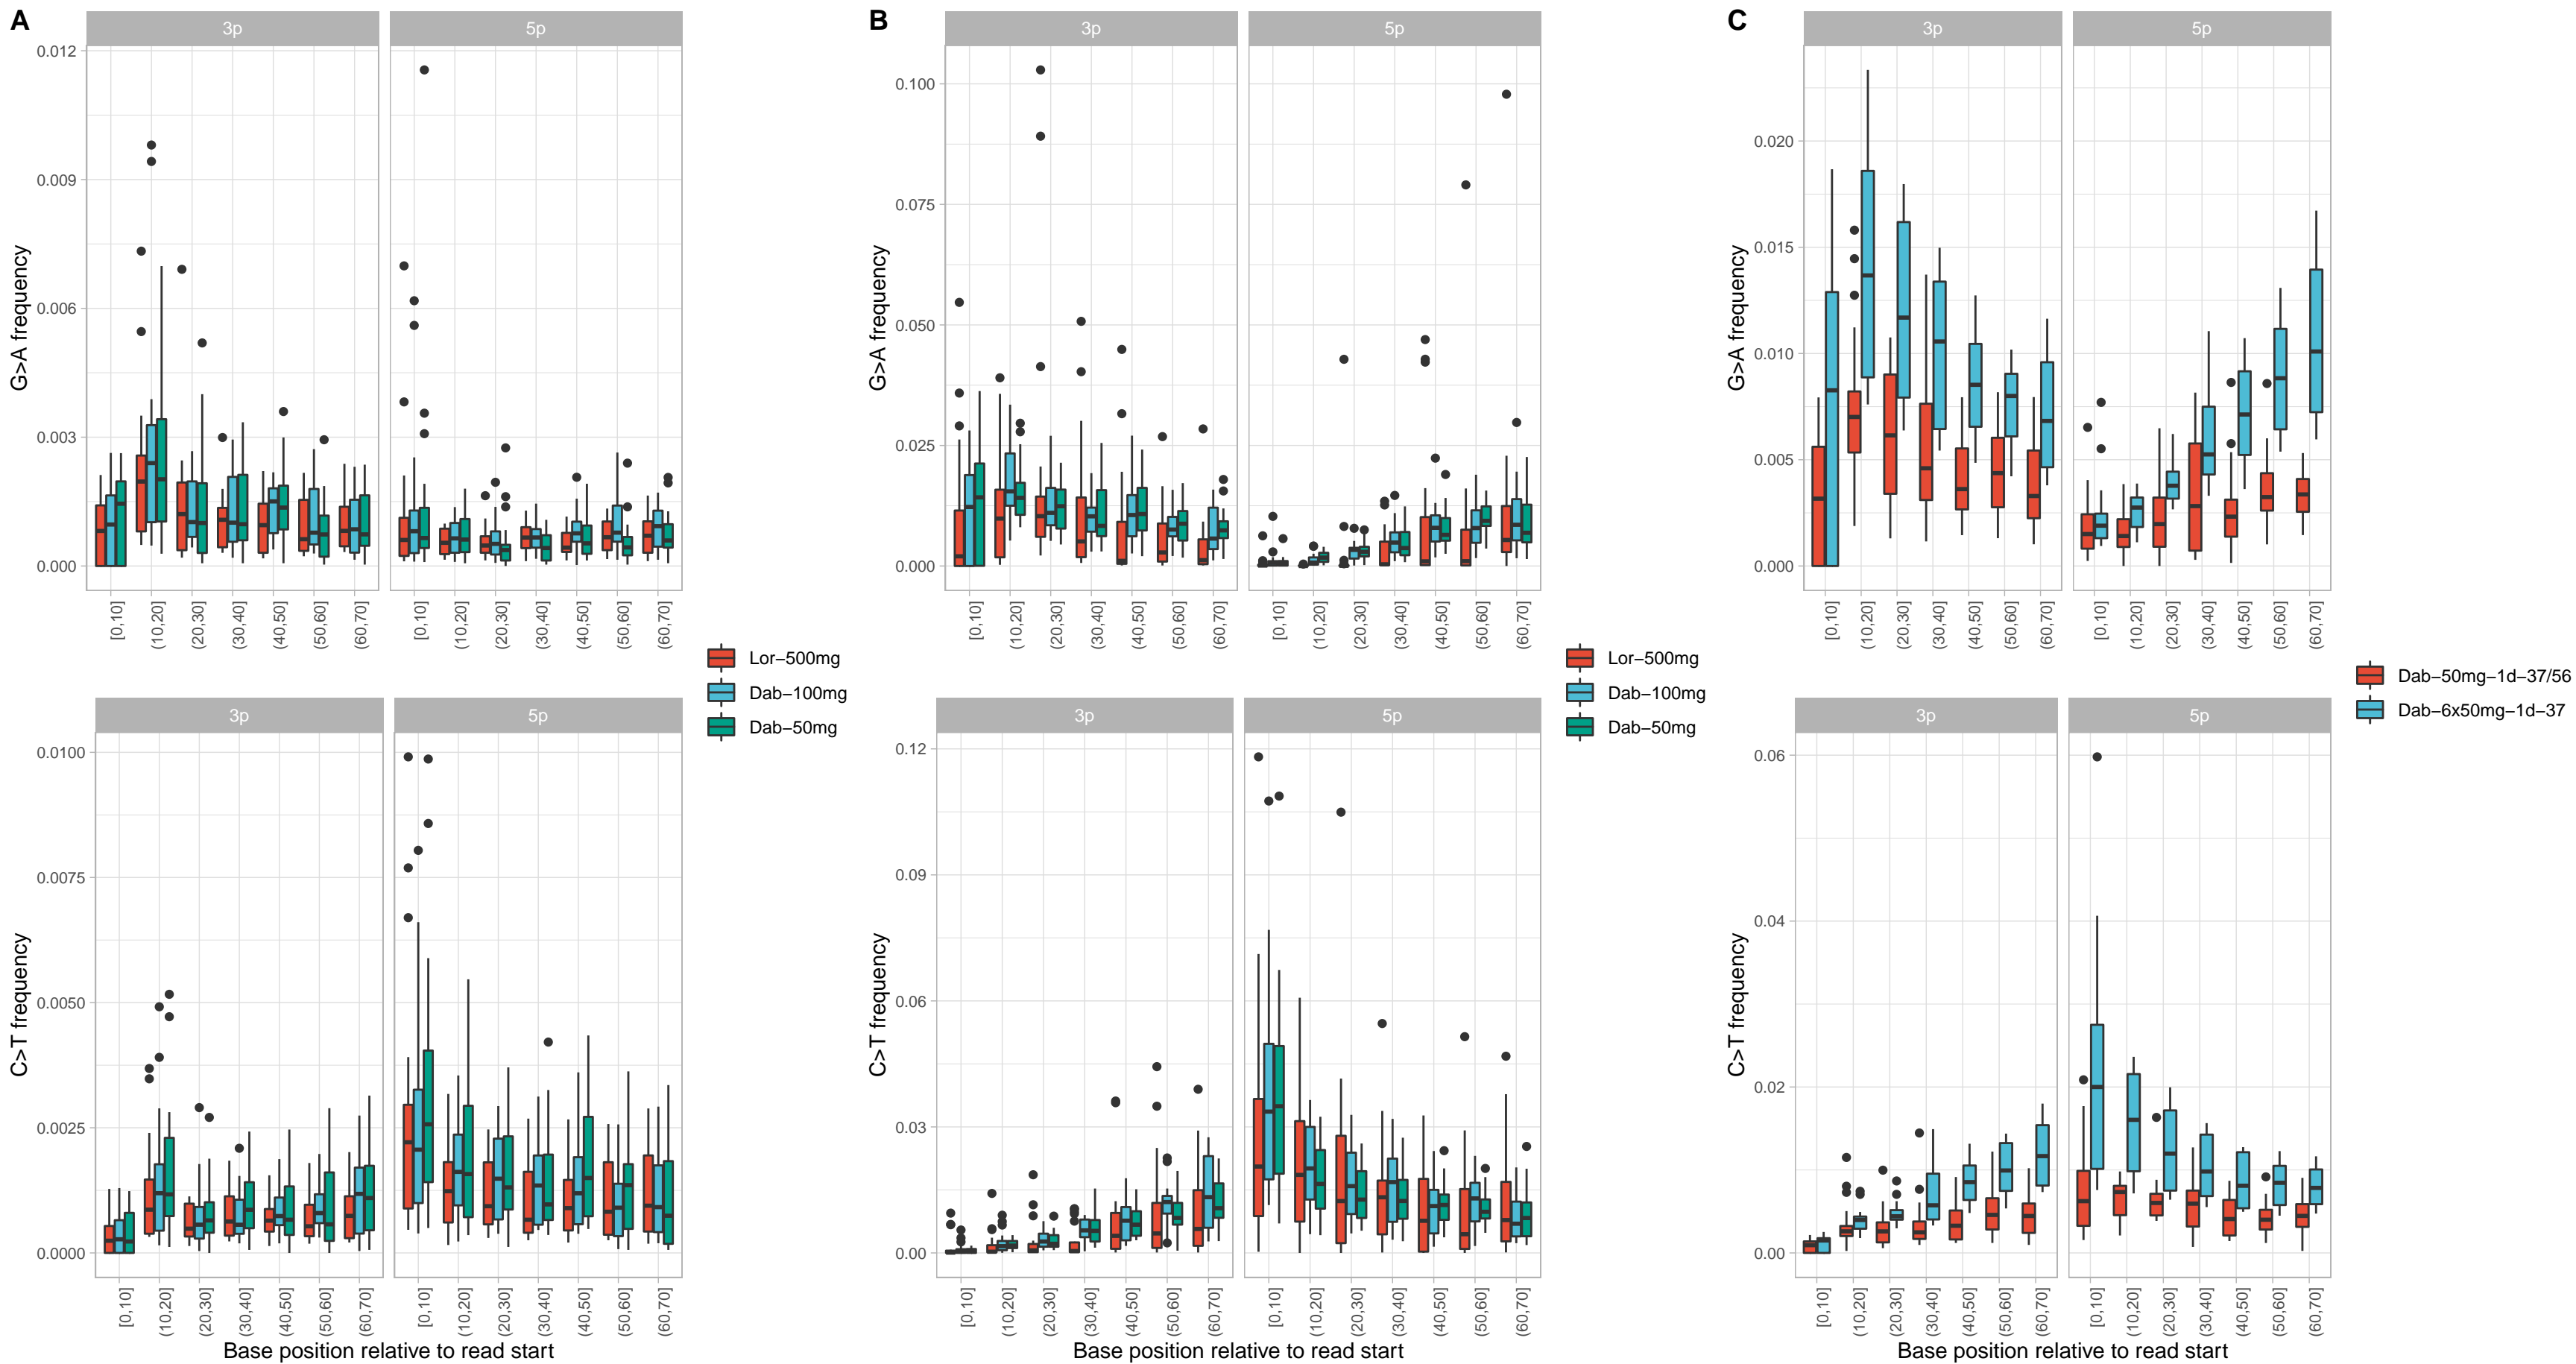

Supplement: s1 [file s1]

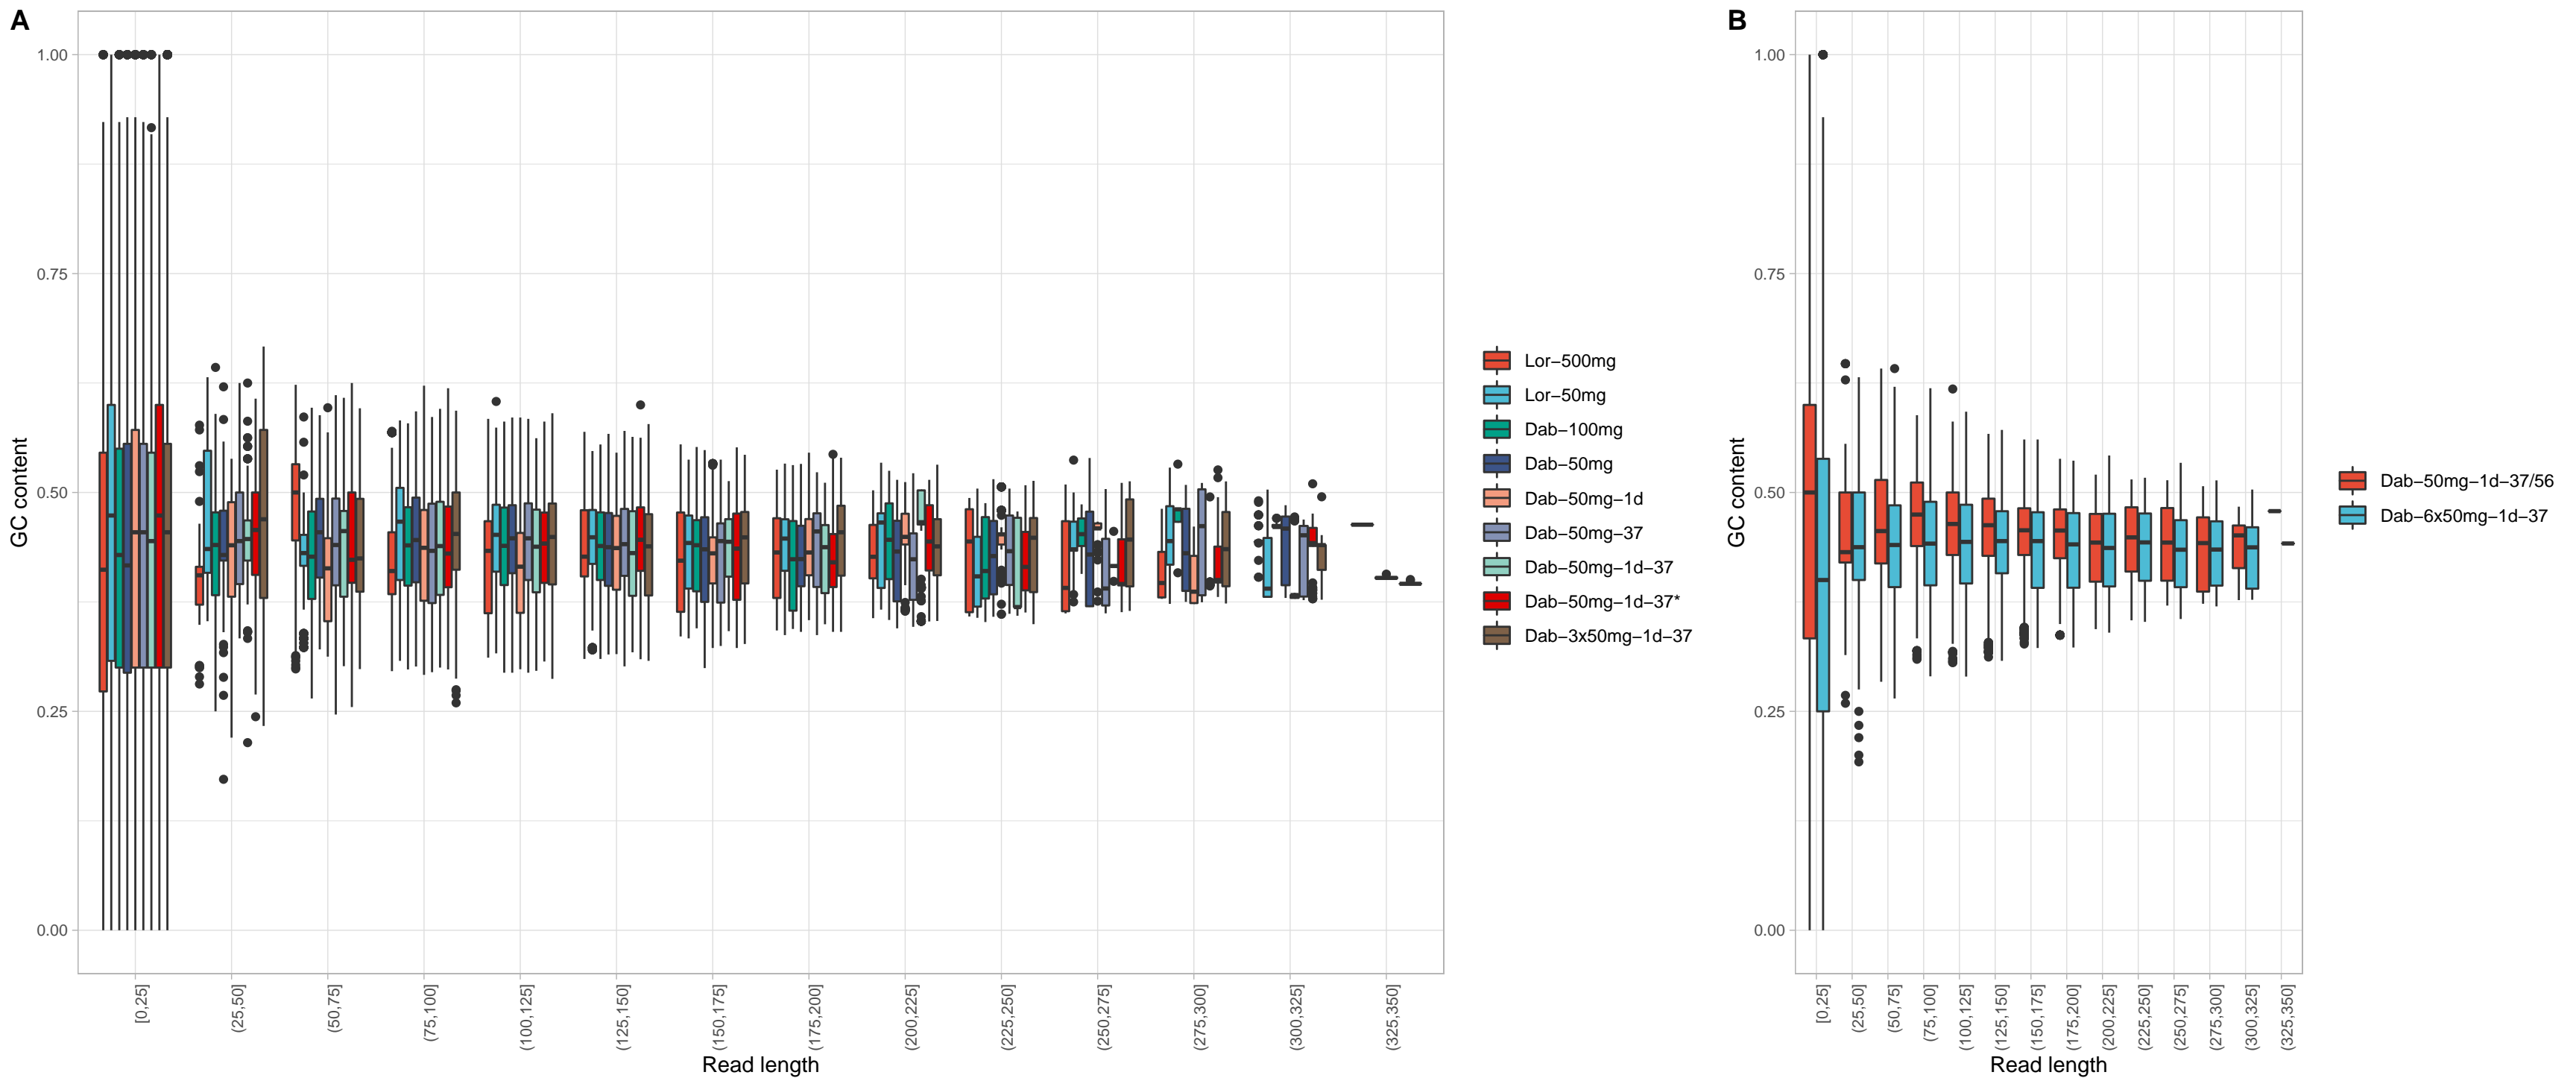

Supplement: s1 [file s1]
